# Supplementary material for: A theoretical study of selective radical relay and coupling reactions for alkene difunctionalization
Source: Royal Society of Chemistry journal article supplement (doi:10.1039/d3qo00357d), 2023-01-01
Supplement: d3qo00357d1.pdf [file d3qo00357d1.pdf]

## Supplementary Information

### A Theoretical Study of Selective Radical Relay and Coupling Reactions for Alkene Difunctionalization

Kai Yang<sup>a</sup>, Jiabin Liu<sup>a</sup>, Dongmin Fu<sup>a</sup>, Linbin Niu <sup>\*a</sup>, Shi-Jun Li <sup>\*a</sup> and Yu Lan <sup>\*a,b</sup>

---

<sup>a</sup> *Green Catalysis Center, and College of Chemistry, Zhengzhou University, Zhengzhou, Henan 450001, China. Email: nlb@zzu.edu.cn; lishijunzong@zzu.edu.cn*

<sup>b</sup> *School of Chemistry and Chemical Engineering, Chongqing Key Laboratory of Theoretical and Computational Chemistry, Chongqing University, Chongqing 400030, China. Email: lanyu@cqu.edu.cn*

## 1. Complete reference for Gaussian 16

Gaussian 16, M. J. Frisch, G. W. Trucks, H. B. Schlegel, G. E. Scuseria, M. A. Robb, J. R. Cheeseman, G. Scalmani, V. Barone, G. A. Petersson, H. Nakatsuji, X. Li, M. Caricato, A. V. Marenich, J. Bloino, B. G. Janesko, R. Gomperts, B. Mennucci, H. P. Hratchian, J. V. Ortiz, A. F. Izmaylov, J. L. Sonnenberg, D. Williams-Young, F. Ding, F. Lipparini, F. Egidi, J. Goings, B. Peng, A. Petrone, T. Henderson, D. Ranasinghe, V. G. Zakrzewski, J. Gao, N. Rega, G. Zheng, W. Liang, M. Hada, M. Ehara, K. Toyota, R. Fukuda, J. Hasegawa, M. Ishida, T. Nakajima, Y. Honda, O. Kitao, H. Nakai, T. Vreven, K. Throssell, J. A. Montgomery, Jr., J. E. Peralta, F. Ogliaro, M. J. Bearpark, J. J. Heyd, E. N. Brothers, K. N. Kudin, V. N. Staroverov, T. A. Keith, R. Kobayashi, J. Normand, K. Raghavachari, A. P. Rendell, J. C. Burant, S. S. Iyengar, J. Tomasi, M. Cossi, J. M. Millam, M. Klene, C. Adamo, R. Cammi, J. W. Ochterski, R. L. Martin, K. Morokuma, O. Farkas, J. B. Foresman, and D. J. Fox, Gaussian, Inc., Wallingford CT, 2016.

## 2. Computational Methods

The density functional theory (DFT)<sup>1</sup> calculations were performed by using the *Gaussian 16* program. The geometric structures of all involved transition states were optimized by using the M06-2X density functional, combined with the def2-SVP. The solvent effects of EtOAc were simulated by the IEF-PCM<sup>2, 3</sup> model. The harmonic frequency calculations were conducted at the same level to corroborate each transition state has one and only one imaginary frequency and other structures have no imaginary frequency. Based on the optimized structures, all energies were refined by conducting single point energy calculations at the M06-2X/def2-TZVP/ IEF-PCM<sub>EtOAc</sub> level of theory.

### The analysis for the electrophilicity and nucleophilicity

The electronic chemical potential  $\mu$  and chemical hardness  $\eta$  can be obtained by the frontier HOMO and LUMO energies<sup>4-6</sup>:

$$\mu = (E_{LUMO} + E_{HOMO}) / 2 \quad (1)$$

$$\eta = (E_{LUMO} - E_{HOMO}) \quad (2)$$

In 1999, Parr defined the electrophilicity  $\omega$  index<sup>7</sup>:

$$\omega = \mu^2 / 2\eta \quad (3)$$

In 2008, Domingo et al. proposed an empirical (relative) nucleophilicity  $N$  index for closed-shell organic molecules based on the HOMO energies. The nucleophilicity  $N$  index is referred to tetracyanoethylene (TCE), which is the most electrophilic neutral species<sup>8</sup>:

$$N = E_H - E_H(TCE) \quad (4)$$

The Fukui function <sup>9</sup>(FF), one of the fundamental quantities in conceptual density functional theory<sup>10</sup> (CDFT), has been extensively explored to describe reactivity and regioselectivity of many chemical reactions. In practice, the condensed-to-atom Fukui functions ( $f_k$ ) at the atom  $k$  are usually evaluated from differences in atomic charges.

$$f_k^+ = q_k(N+1) - q_k(N) \quad (5)$$

$$f_k^- = q_k(N) - q_k(N-1) \quad (6)$$

where  $q_k$  is the electronic charge of atom  $k$  and  $N$  is the number of electrons. The three condensed Fukui functions  $f_k^+$ ,  $f_k^-$  and characterize the reactivity preferences for nucleophilic, electrophilic, and radical attacks, respectively. In general, the larger the value of a condensed-to-atom Fukui function, the greater the reactivity of the corresponding atom.

In addition, according to Domingo's definition, the local electrophilicity ( $\omega_k$ ) and local nucleophilicity ( $N_k$ ) index can be expressed by the following equations<sup>11</sup>:

$$N_k = N \times f_k^- \quad (7)$$

$$\omega_k = \omega \times f_k^+ \quad (8)$$

### The calculation for the rate of EET

Excitation energy transfer (EET) is a process which an excited-state donor molecule transfers energy to a nearby ground state receptor molecule. The calculation of the rate constant of the energy switch theory uses Dexter theory<sup>12</sup>. Within Fermi's Golden

Rule<sup>13</sup>, the rate of EET ( $k_{EET}$ ) can be expressed as:

$$k_{EET} = \frac{2\pi}{\hbar} |V|^2 J_D$$

where  $\hbar$  is the reduced Planck's constant,  $V$  is the electronic coupling factor, and  $J_D$  is known as the spectral overlap term. Each of the terms can be computed for a system of interest using quantum chemical calculations where the  $J_D$  is considered to be <sup>14, 15</sup>.

### Conformations searching

In order to investigate the multistructural and torsional effect, by using CREST (version 2.12)<sup>16</sup> in combination with the xTB package (version 6.4.0)<sup>17</sup>, the conformations of transition states and intermediates have been carried out at the GFN2-xTB level<sup>18</sup>.

### 3. Possible Pathways for intermediate $T_2$ direct radical addition to styrene

All of four possible pathway for the triplet intermediate  $T_2$  radical addition to the styrene 6 have been investigated as shown in the Scheme. S1.

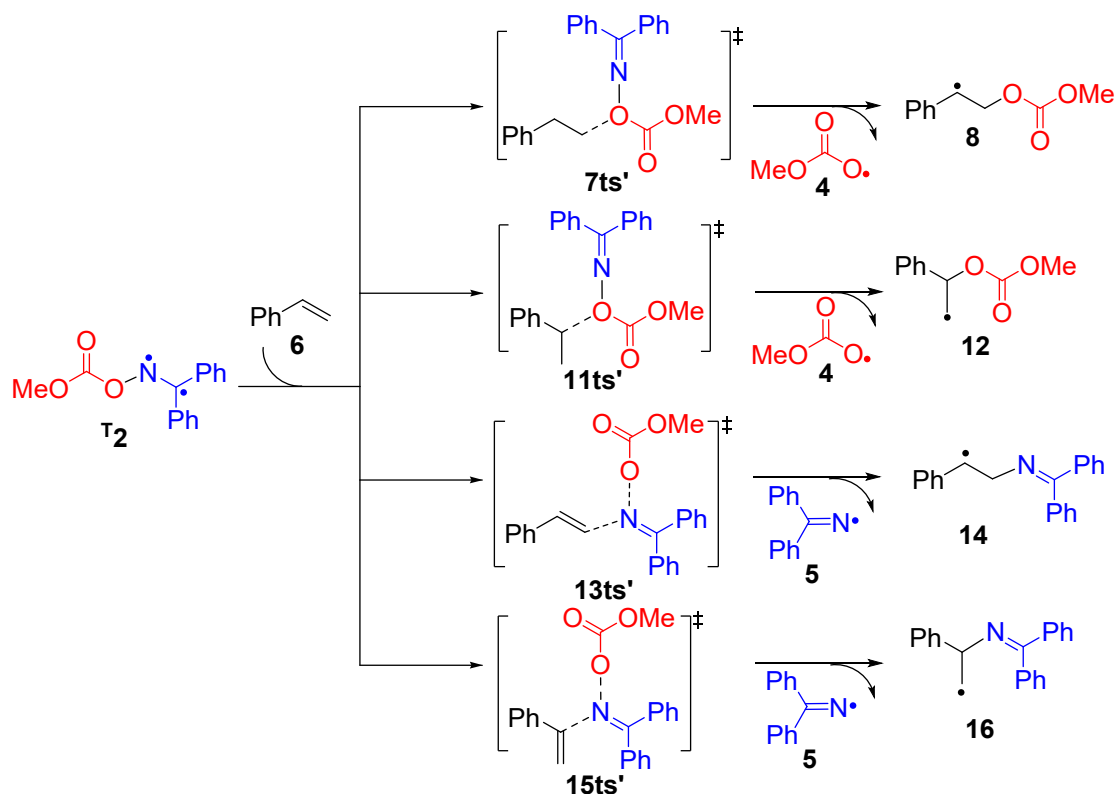

**Scheme. S1** Four possible pathways for the triplet intermediate  $T_2$  radical addition to the styrene 6

The calculated results (Fig. S1) clearly show that the radical addition process would overcome the free energy barrier of at least 22.0 kcal/mol (**13ts'**), which would be much higher than that of homolysis of intermediate **T2** (7.1 kcal/mol). Hence, we can exclude that intermediate **T2** directly reacts with styrene **6** without the process of hemolysis.

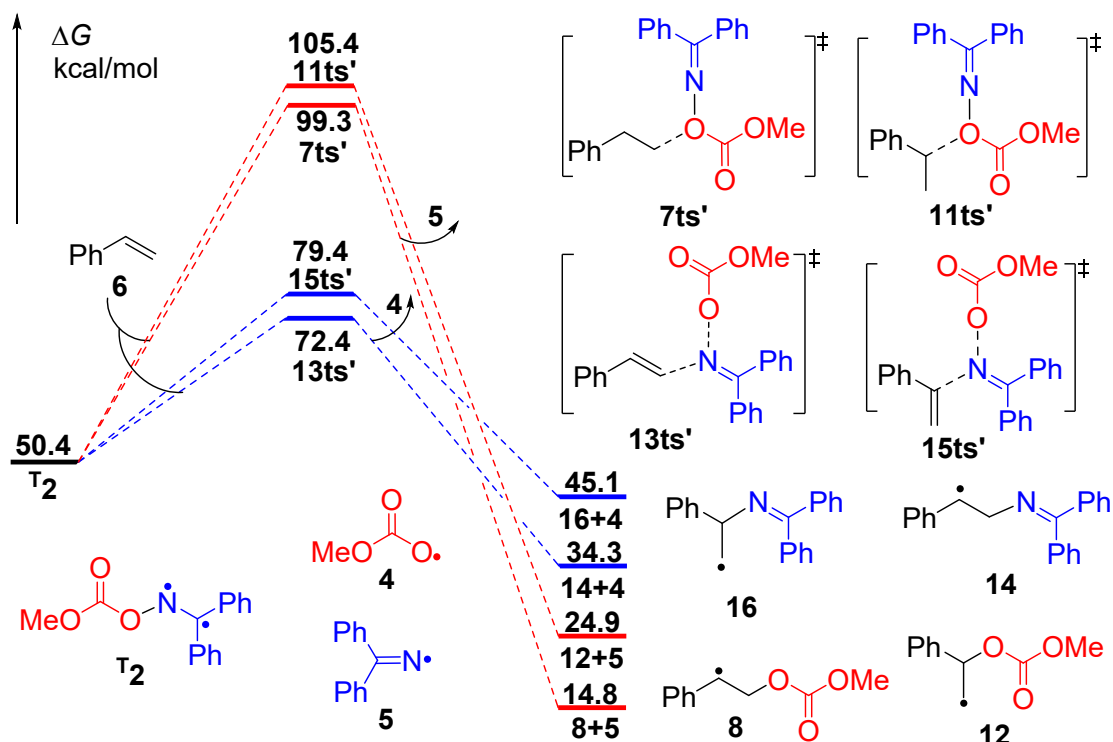

Fig. S1 The energy profile for the intermediate **T2** direct radical addition to styrene

#### 4. The SET process between the radical **4**, **5**, **8** and radical **8**

The SET process for the radical species could occur leading to the formation of anions and cations. We have calculated the possible transformation of intermediate **8** as shown in the Fig. S2. It should be noticed that the thermodynamic for the most of SET would be endothermic (at least 55 kcal/mol), implying the process would be impossible to happen. The SET of **8** and **4** is exothermic. Furthermore, the calculated barrier would be only 1.9 kcal/mol, which would be lower than the radical coupling process.

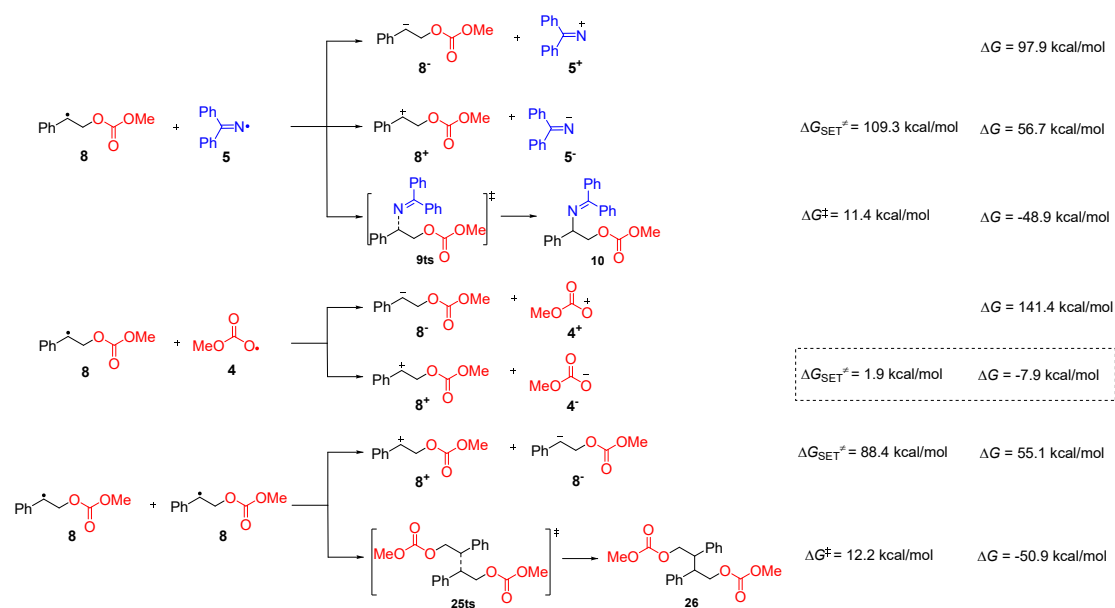

**Fig. S2** The SET process between the radical **4**, **5**, **8** and radical **8** (kcal/mol)

## 5. The local electrophilicity and nucleophilicity, free energy barrier for radical addition and thermodynamic results for other radical species

We have calculated local electrophilicity and nucleophilicity of the extra three radical as shown in the Table S1. The results shows the index for local electrophilicity are bigger than that of nucleophilicity. Furthermore, free energy barrier for the radical addition process have been also calculated. Based on the general model, the stronger electrophilicity, the faster the reaction undergoes.

**Table S1** The local electrophilicity and nucleophilicity, free energy barrier for radical addition and thermodynamic results for five radical species

| Radicals | Local electrophilicity | Local nucleophilicity | Transition state of radicals adding to styrene | Energy barrier of transition state $\Delta G^\ddagger$ (kcal/mol) |
|----------|------------------------|-----------------------|------------------------------------------------|-------------------------------------------------------------------|
|          | 0.470                  | 0.292                 |                                                | 23.1                                                              |
|          | 0.918                  | -0.008                |                                                | 14.2                                                              |
|          | 1.365                  | -0.376                |                                                | 10.2                                                              |

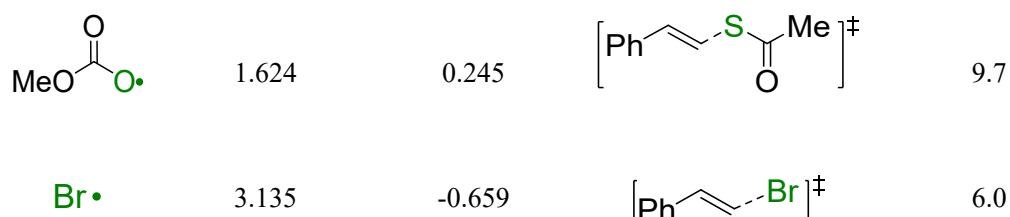

## 6. Main conformations of transition states and intermediates

In order to find out the favorable structures in the calculations, we have used the CREST program to perform a conformational search for key transition states **7ts** and **9ts**, and intermediate **8** in the revised manuscript. After locating the transition state conformation with the lowest energy, we have computed intrinsic reaction coordinate (IRC) to ensure that the transition state connects the two expected intermediates. The calculated results show the difference for the conformers would be quite close.

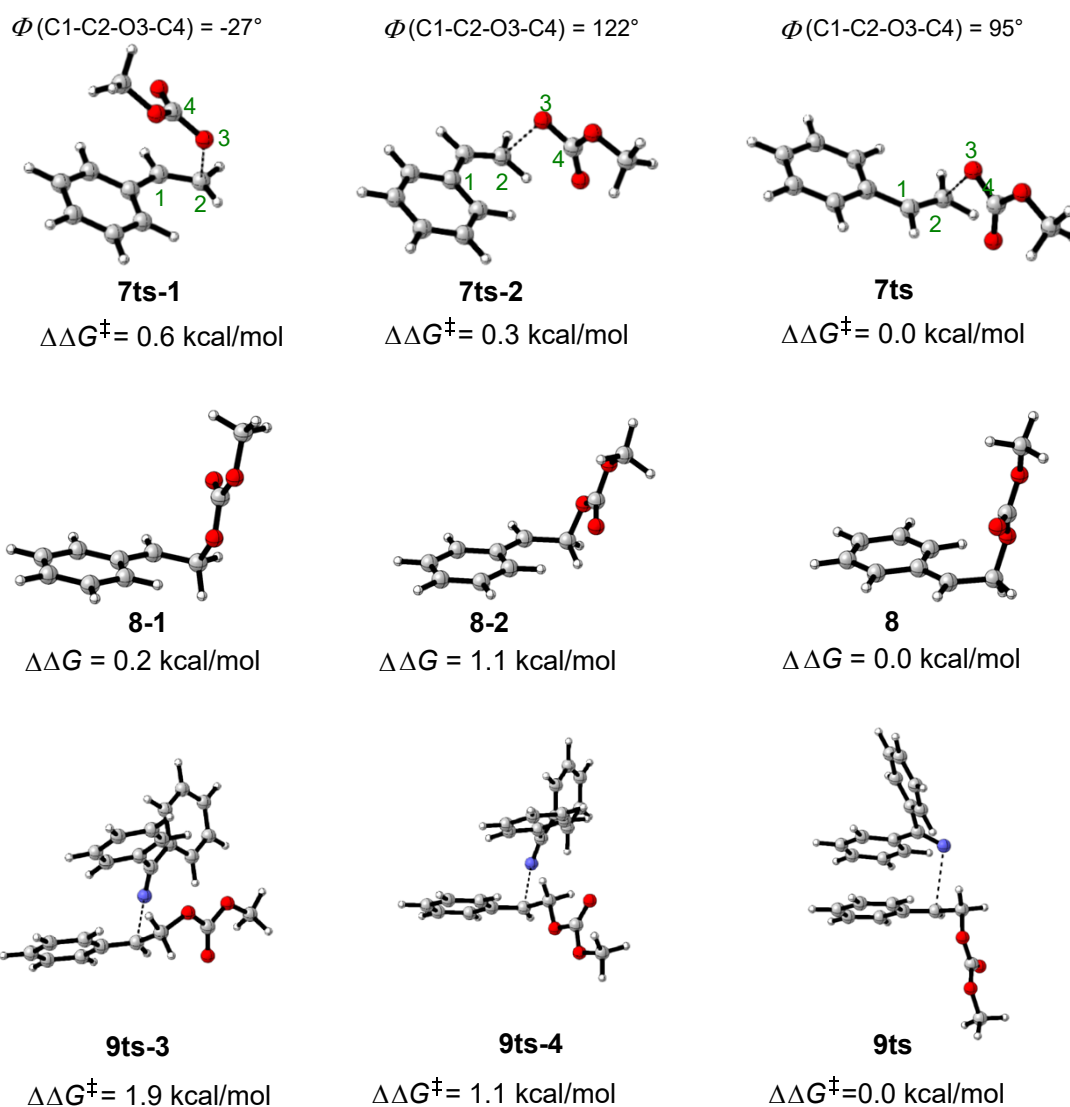

**Fig. S3** The main rotational isomers of transition states and intermediates

## 7. The multistructural and torsional effect

The multistructural and torsional effect would be very important in the organic chemistry. The most stable intermediate and transition state would majorly affect the kinetic rate. As shown in the Table S2, S3, S4 and S5, the Boltzmann distribution, average Gibbs free energy and  $\Delta\Delta G$  for the species have been calculated based on the free energy. The calculated results clearly show the free energy barrier based on the multistructural and torsional effect would be quite close to the most stable one.

**Table S2** The free energy, proportion and the relative free energy ( $\Delta G$ ) for the conformations of transition state **7ts** ( $\Delta\Delta G = \text{Average } \Delta G - \text{Minimum } \Delta G$ )

| Conformations               | Gibbs free energy corrections $G$ (Hartree) | Proportion (%) | (kcal/mol) $\Delta G^\ddagger$ |
|-----------------------------|---------------------------------------------|----------------|--------------------------------|
| 7ts-1                       | -613.109262                                 | 17.97          | 48.9                           |
| 7ts-2                       | -613.109769                                 | 30.85          | 48.6                           |
| <b>7ts</b>                  | <b>-613.110251</b>                          | <b>51.18</b>   | <b>48.3</b>                    |
| Average $\Delta G^\ddagger$ |                                             | 48.5 kcal/mol  |                                |
| $\Delta\Delta G$            |                                             | 0.2 kcal/mol   |                                |

**Table S3** The free energy, proportion and the relative free energy ( $\Delta G$ ) for the conformations of intermediate **8** ( $\Delta\Delta G = \text{Average } \Delta G - \text{Minimum } \Delta G$ )

| Conformations      | Gibbs free energy corrections $G$ (Hartree) | Proportion (%) | $\Delta G$ (kcal/mol) |
|--------------------|---------------------------------------------|----------------|-----------------------|
| 8-1                | -613.163263                                 | 36.07          | 15.0                  |
| 8-2                | -613.161735                                 | 7.63           | 15.9                  |
| 8-3                | -613.161473                                 | 5.45           | 16.1                  |
| 8-4                | -613.15933                                  | 0.61           | 17.4                  |
| 8-5                | -613.159675                                 | 0.85           | 17.2                  |
| <b>8</b>           | <b>-613.163551</b>                          | <b>48.88</b>   | <b>14.8</b>           |
| 8-6                | -613.15921                                  | 0.51           | 17.5                  |
| Average $\Delta G$ |                                             | 15.1 kcal/mol  |                       |
| $\Delta\Delta G$   |                                             | 0.3 kcal/mol   |                       |

**Table S4** The free energy, proportion and the relative free energy ( $\Delta G$ ) for the conformations of transition state **9ts** ( $\Delta\Delta G = \text{Average } \Delta G - \text{Minimum } \Delta G$ )

| Conformations | Gibbs free energy | Proportion | (kcal/mol) $\Delta G^\ddagger$ |
|---------------|-------------------|------------|--------------------------------|
|---------------|-------------------|------------|--------------------------------|



|                             | corrections $G$<br>(Hartree) | (%)           | l/mol)      |
|-----------------------------|------------------------------|---------------|-------------|
| 9ts-1                       | -1169.058719                 | 4.49          | 24.4        |
| 9ts-2                       | -1169.0572                   | 0.83          | 25.4        |
| <b>9ts</b>                  | <b>-1169.06142</b>           | <b>79.12</b>  | <b>22.7</b> |
| 9ts-3                       | -1169.058334                 | 3.20          | 24.6        |
| 9ts-4                       | -1169.05967                  | 12.36         | 23.8        |
| Average $\Delta G^\ddagger$ |                              | 23.0 kcal/mol |             |
| $\Delta\Delta G$            |                              | 0.3 kcal/mol  |             |

**Table S5** The free energy, proportion and f the relative free energy ( $\Delta G$ ) for the conformations of intermediate **10** ( $\Delta\Delta G = \text{Average } \Delta G - \text{Minimum } \Delta G$ )

| Conformations      | Gibbs free energy            |                   | $\Delta G$<br>(kcal/mol) |
|--------------------|------------------------------|-------------------|--------------------------|
|                    | corrections $G$<br>(Hartree) | Proportion<br>(%) |                          |
| 10-1               | -1169.150055                 | 0.13              | 40.2                     |
| <b>10</b>          | <b>-1169.155813</b>          | <b>58.71</b>      | <b>36.6</b>              |
| 10-2               | -1169.147627                 | 0.01              | 41.7                     |
| 10-3               | -1169.150087                 | 0.13              | 40.2                     |
| 10-4               | -1169.149857                 | 0.11              | 40.3                     |
| 10-5               | -1169.154069                 | 9.17              | 37.7                     |
| 10-6               | -1169.155158                 | 29.89             | 37.0                     |
| 10-7               | -1169.14139                  | 0.00              | 45.7                     |
| 10-8               | -1169.1501                   | 0.13              | 40.2                     |
| 10-9               | -1169.152468                 | 1.70              | 38.7                     |
| 10-10              | -1169.1433                   | 0.00              | 44.7                     |
| 10-11              | -1169.1425                   | 0.00              | 45.0                     |
| 10-12              | -1169.144829                 | 0.00              | 43.5                     |
| Average $\Delta G$ |                              | 6.9 kcal/mol      |                          |
| $\Delta\Delta G$   |                              | 0.3 kcal/mol      |                          |

## 8. The energies of all the optimized structures

**Table S6.** The single-point energies (E) at M06-2X/def2-TZVP/IEF-PCM, Gibbs free energy corrections (GFEC) at M06-2X/def2-SVP/IEF-PCM, Zero-point Energy Correction (ZPE) at M06-2X/def2-SVP/IEF-PCM and GFE (=E+GFEC) energies of the stationary points (SPs) involved in the reaction (unit: a.u.)

| SP       | GFEC     | ZPE      | E           | GFE         | Imaginary<br>Frequency | Rotational<br>Constants (GHZ) | Point<br>Group |
|----------|----------|----------|-------------|-------------|------------------------|-------------------------------|----------------|
| <b>1</b> | 0.136367 | 0.173820 | -973.612450 | -973.476083 |                        | 1.22662<br>0.42501            | CS             |

|             |          |              |             |             |                 |                                |    |
|-------------|----------|--------------|-------------|-------------|-----------------|--------------------------------|----|
|             |          |              |             |             |                 | 0.31564                        |    |
| <b>*1</b>   | 0.132197 | 0.17066<br>5 | -973.477007 | -973.34481  |                 | 1.23113<br>0.42171<br>0.31411  | CS |
| <b>T1</b>   | 0.130899 | 0.16941<br>2 | -973.502555 | -973.371656 |                 | 1.22502<br>0.42554<br>0.31583  | CS |
| <b>1-</b>   | 0.133373 | 0.16997<br>5 | -973.696498 | -973.563125 |                 | 1.21450<br>0.42222<br>0.31330  | CS |
| <b>1+</b>   | 0.135604 | 0.17334<br>0 | -973.371645 | -973.236041 |                 | 1.23506<br>0.42637<br>0.31695  | CS |
| <b>2</b>    | 0.207313 | 0.25335<br>6 | -859.788764 | -859.581451 |                 | 0.40857<br>0.30187<br>0.18264  | C1 |
| <b>T2</b>   | 0.202569 | 0.25061<br>2 | -859.703718 | -859.501149 |                 | 0.38765<br>0.30998<br>0.18484  | C1 |
| <b>2-</b>   | 0.203388 | 0.24981<br>8 | -859.862957 | -859.659569 |                 | 0.41134<br>0.29693<br>0.17935  | C1 |
| <b>2+</b>   | 0.206643 | 0.25199<br>7 | -859.527346 | -859.320703 |                 | 0.40530<br>0.30873<br>0.18234  | C1 |
| <b>T3ts</b> | 0.200177 | 0.24879<br>4 | -859.689956 | -859.489779 | 531.38 <i>i</i> | 0.42588<br>0.29669<br>0.18735  | C1 |
| <b>4</b>    | 0.024361 | 0.05392<br>4 | -303.634779 | -303.610418 |                 | 12.03310<br>4.54543<br>3.37061 | C1 |
| <b>5</b>    | 0.153932 | 0.19238<br>8 | -556.064275 | -555.910343 |                 | 1.72028<br>0.41184<br>0.35911  | C1 |
| <b>6</b>    | 0.103074 | 0.13447<br>3 | -309.619158 | -309.516084 |                 | 5.17097<br>1.54248<br>1.18808  | C1 |
| <b>7ts</b>  | 0.146979 | 0.19034<br>0 | -613.257230 | -613.110251 | 62.21 <i>i</i>  | 0.99820<br>0.78834<br>0.57543  | C1 |
| <b>8</b>    | 0.153826 | 0.19435<br>7 | -613.317097 | -613.163271 |                 | 1.61194<br>0.40105<br>0.38149  | C1 |
| <b>9ts</b>  | 0.330697 | 0.38759      | -           | -1169.06142 | 16.78 <i>i</i>  | 0.26661                        | C1 |

|             |              |              |                  |                  |                 |                                     |     |
|-------------|--------------|--------------|------------------|------------------|-----------------|-------------------------------------|-----|
|             |              | 8            | 1169.392121      |                  |                 | 0.12562<br>0.10411                  |     |
| <b>10</b>   | 0.33684<br>5 | 0.39410<br>2 | -<br>1169.492658 | -<br>1169.155813 |                 | 0.20442<br>0.17201<br>0.11805       | C1  |
| <b>11ts</b> | 0.150291     | 0.19020<br>1 | -613.255257      | -613.104966      | 126.22 <i>i</i> | 1.13103<br>0.68649<br>0.63002       | C1  |
| <b>12</b>   | 0.149357     | 0.19174<br>9 | -613.296876      | -613.147519      |                 | 1.4015679<br>0.5015610<br>0.4388015 | C1  |
| <b>13ts</b> | 0.279029     | 0.32762<br>4 | -865.668549      | -865.38952       | 564.31 <i>i</i> | 0.54717<br>0.18917<br>0.17027       | C1  |
| <b>14</b>   | 0.280785     | 0.33049<br>1 | -865.713296      | -865.432511      |                 | 0.33862<br>0.20805<br>0.15900       | C1  |
| <b>15ts</b> | 0.277689     | 0.32730<br>6 | -865.658348      | -865.380659      | 635.08 <i>i</i> | 0.35671<br>0.19423<br>0.13742       | C1  |
| <b>16</b>   | 0.279390     | 0.32911<br>4 | -865.694644      | -865.415254      |                 | 0.38625<br>0.21301<br>0.16508       | C1  |
| <b>17ts</b> | 0.072971     | 0.11155<br>3 | -607.268380      | -607.195409      | 161.14 <i>i</i> | 3.64827<br>0.61141<br>0.57933       | C1  |
| <b>18</b>   | 0.078729     | 0.11587<br>7 | -607.336874      | -607.258145      |                 | 4.13165<br>0.67156<br>0.64805       | C1  |
| <b>19ts</b> | 0.331424     | 0.38612<br>2 | -<br>1112.131126 | -<br>1111.799702 | 155.32 <i>i</i> | 0.35054<br>0.11652<br>0.11241       | C1  |
| <b>20</b>   | 0.336218     | 0.39043<br>2 | -<br>1112.220296 | -<br>1111.884078 |                 | 0.29314<br>0.12835<br>0.12198       | C1  |
| <b>21ts</b> | 0.201995     | 0.24843<br>6 | -859.704732      | -859.502737      | 48.70 <i>i</i>  | 0.72820<br>0.23907<br>0.20552       | C1  |
| <b>22ts</b> | 0.021799     | 0.05144<br>1 | -303.611430      | -303.589631      | 716.12 <i>i</i> | 9.84256<br>4.41955<br>3.44924       | C1  |
| <b>23</b>   | 0.013292     | 0.03636<br>5 | -115.044003      | -115.030711      |                 | 156.46938<br>28.08320<br>27.85303   | C3V |

|                |               |              |                  |                   |        |                               |    |
|----------------|---------------|--------------|------------------|-------------------|--------|-------------------------------|----|
| <b>24</b>      | 0.209046      | 0.25681<br>5 | -917.089591      | -916.880545       |        | 0.36048<br>0.34132<br>0.20711 | C1 |
| <b>25ts</b>    | 0.332345      | 0.38905<br>4 | -<br>1226.640378 | -<br>1226.308033  | 32.27i | 0.33270<br>0.14850<br>0.12375 | C1 |
| <b>26</b>      | 0.338245      | 0.39659<br>9 | -<br>1226.746466 | -<br>1,226.408221 |        | 0.29473<br>0.15177<br>0.10991 | C1 |
| <b>CO</b><br>2 | -<br>0.004650 | 0.01051<br>9 | -188.598845      | -188.603495       |        | 11.81900<br>11.81900          | CS |

## 9. Reference

- W. J. Hehre, R. Ditchfield and J. A. Pople, Self—Consistent Molecular Orbital Methods. XII. Further Extensions of Gaussian—Type Basis Sets for Use in Molecular Orbital Studies of Organic Molecules, *J. Chem. Phys.*, 1972, **56**, 2257-2261.
- V. Barone and M. Cossi, Quantum calculation of molecular energies and energy gradients in solution by a conductor solvent model, *J. Phys. Chem. A*, 1998, **102**, 1995-2001.
- B. Mennucci and J. Tomasi, Continuum solvation models: A new approach to the problem of solute's charge distribution and cavity boundaries, *J. Chem. Phys.*, 1997, **106**, 5151-5158.
- T. Koopmans, Über die Zuordnung von Wellenfunktionen und Eigenwerten zu den einzelnen Elektronen eines Atoms, *physica*, 1934, **1**, 104-113.
- W. Kohn and L. J. Sham, Self-consistent equations including exchange and correlation effects, *Phys. Rev.*, 1965, **140**, A1133.
- R. G. Parr and R. G. Pearson, Absolute Hardness-Companion Parameter to Absolute Electronegativity, *J. Am. Chem. Soc.*, 1983, **105**, 7512-7516.
- R. G. Parr, L. Von Szentpaly and S. B. Liu, Electrophilicity index, *J. Am. Chem. Soc.*, 1999, **121**, 1922-1924.
- L. R. Domingo, E. Chamorro and P. Perez, Understanding the reactivity of captodative ethylenes in polar cycloaddition reactions. A theoretical study, *J. Org. Chem.*, 2008, **73**, 4615-4624.
- R. G. Parr and W. T. Yang, Density Functional-Approach to the Frontier-Electron Theory of Chemical-Reactivity, *J. Am. Chem. Soc.*, 1984, **106**, 4049-4050.
- W. Yang and W. J. Mortier, The use of global and local molecular parameters for the analysis of the gas-phase basicity of amines, *J. Am. Chem. Soc.*, 1986, **108**, 5708-5711.
- L. R. Domingo, P. Perez and J. A. Saez, Understanding the local reactivity in polar organic reactions through electrophilic and nucleophilic Parr functions, *RSC. Adv.*, 2013, **3**, 1486-1494.
- D. L. Dexter, A theory of sensitized luminescence in solids, *J. Chem. Phys.*, 1953, **21**, 836-850.
- P. A. M. Dirac, The quantum theory of the emission and absorption of radiation, *Proceedings of the Royal Society of London. Series A, Containing Papers of a Mathematical and Physical Character*, 1997, **114**, 243-265.
- F. Strieth-Kalthoff, M. J. James, M. Teders, L. Pitzer and F. Glorius, Energy transfer catalysis mediated by visible light: principles, applications, directions, *Chem. Soc. Rev.*, 2018, **47**, 7190-7202.

15. Z. C. Wong, W. Y. Fan and T. S. Chwee, Computational modelling of singlet excitation energy transfer: a DFT/TD-DFT study of the ground and excited state properties of a syn bimane dimer system using non-empirically tuned range-separated functionals, *New. J. Chem.*, 2018, **42**, 13732-13743.
16. P. Pracht, F. Bohle and S. Grimme, Automated exploration of the low-energy chemical space with fast quantum chemical methods, *Physical Chemistry Chemical Physics*, 2020, **22**, 7169-7192.
17. C. Bannwarth, E. Caldeweyher, S. Ehlert, A. Hansen, P. Pracht, J. Seibert, S. Spicher and S. Grimme, Extended tight-binding quantum chemistry methods, *WIREs Computational Molecular Science*, 2021, **11**, e1493.
18. C. Bannwarth, S. Ehlert and S. Grimme, GFN2-xTB—An Accurate and Broadly Parametrized Self-Consistent Tight-Binding Quantum Chemical Method with Multipole Electrostatics and Density-Dependent Dispersion Contributions, *Journal of Chemical Theory and Computation*, 2019, **15**, 1652-1671.

## 10. Geometrical Coordinates of the Listed Compounds

1

0 1

|   |           |           |           |
|---|-----------|-----------|-----------|
| C | 0.000008  | -0.624433 | 3.791538  |
| C | 0.000015  | -1.391240 | 2.637620  |
| C | -0.000032 | -0.771049 | 1.375477  |
| C | -0.000022 | 0.630016  | 1.284154  |
| C | -0.000032 | 1.386144  | 2.470702  |
| C | -0.000032 | 0.775453  | 3.712444  |
| C | 0.000022  | 1.382837  | -0.000000 |
| C | -0.000022 | 0.630016  | -1.284154 |
| C | -0.000032 | -0.771049 | -1.375477 |
| C | 0.000015  | -1.391240 | -2.637620 |
| H | 0.000025  | -2.481039 | -2.700592 |
| C | 0.000008  | -0.624433 | -3.791538 |
| C | -0.000032 | 0.775453  | -3.712444 |
| C | -0.000032 | 1.386144  | -2.470702 |
| H | 0.000025  | -1.119226 | 4.763754  |
| H | 0.000025  | -2.481039 | 2.700592  |
| H | -0.000038 | 2.471679  | 2.371218  |
| H | -0.000026 | 1.377014  | 4.621598  |
| H | 0.000025  | -1.119226 | -4.763754 |
| H | -0.000026 | 1.377014  | -4.621598 |
| H | -0.000038 | 2.471679  | -2.371218 |
| S | 0.000030  | -1.853348 | 0.000000  |
| O | 0.000071  | 2.600125  | -0.000000 |

\*1

0 1

|   |           |          |          |
|---|-----------|----------|----------|
| C | -0.614093 | 0.000307 | 3.810199 |
|---|-----------|----------|----------|

|                      |           |           |           |
|----------------------|-----------|-----------|-----------|
| C                    | -1.380782 | 0.000149  | 2.646631  |
| C                    | -0.773785 | -0.000128 | 1.388731  |
| C                    | 0.634711  | -0.000162 | 1.289847  |
| C                    | 1.395626  | 0.000016  | 2.478281  |
| C                    | 0.778809  | 0.000206  | 3.722307  |
| C                    | 1.307387  | -0.000313 | 0.000000  |
| C                    | 0.634711  | -0.000162 | -1.289847 |
| C                    | -0.773785 | -0.000128 | -1.388731 |
| C                    | -1.380782 | 0.000149  | -2.646631 |
| H                    | -2.470953 | 0.000232  | -2.709345 |
| C                    | -0.614093 | 0.000307  | -3.810199 |
| C                    | 0.778809  | 0.000206  | -3.722307 |
| C                    | 1.395626  | 0.000016  | -2.478281 |
| H                    | -1.108514 | 0.000507  | 4.781868  |
| H                    | -2.470953 | 0.000232  | 2.709345  |
| H                    | 2.484151  | 0.000012  | 2.408061  |
| H                    | 1.388321  | 0.000350  | 4.626540  |
| H                    | -1.108514 | 0.000507  | -4.781868 |
| H                    | 1.388321  | 0.000350  | -4.626540 |
| H                    | 2.484151  | 0.000012  | -2.408061 |
| S                    | -1.858392 | -0.000270 | -0.000000 |
| O                    | 2.602264  | -0.000084 | 0.000000  |
| <b>T<sub>1</sub></b> |           |           |           |
| 0 3                  |           |           |           |
| C                    | 0.663178  | 0.000083  | 3.800162  |
| C                    | 1.412773  | 0.000038  | 2.631466  |
| C                    | 0.767703  | -0.000039 | 1.385140  |
| C                    | -0.657090 | -0.000090 | 1.262283  |
| C                    | -1.381939 | -0.000046 | 2.472280  |
| C                    | -0.738935 | 0.000044  | 3.702811  |
| C                    | -1.373573 | -0.000205 | 0.000000  |
| C                    | -0.657090 | -0.000090 | -1.262283 |
| C                    | 0.767703  | -0.000039 | -1.385140 |
| C                    | 1.412773  | 0.000038  | -2.631466 |
| H                    | 2.504189  | 0.000069  | -2.670224 |
| C                    | 0.663178  | 0.000083  | -3.800162 |
| C                    | -0.738935 | 0.000044  | -3.702811 |
| C                    | -1.381939 | -0.000046 | -2.472280 |
| H                    | 1.156470  | 0.000145  | 4.771148  |
| H                    | 2.504189  | 0.000069  | 2.670224  |
| H                    | -2.468492 | -0.000094 | 2.400793  |
| H                    | -1.339405 | 0.000072  | 4.614586  |
| H                    | 1.156470  | 0.000145  | -4.771148 |
| H                    | -1.339405 | 0.000072  | -4.614586 |

|           |           |           |           |
|-----------|-----------|-----------|-----------|
| H         | -2.468492 | -0.000094 | -2.400793 |
| S         | 1.808492  | -0.000029 | 0.000000  |
| O         | -2.648528 | 0.000181  | 0.000000  |
| <b>1-</b> |           |           |           |
| -1 2      |           |           |           |
| C         | 0.619357  | -0.000181 | 3.821814  |
| C         | 1.386090  | -0.000069 | 2.648877  |
| C         | 0.778610  | 0.000078  | 1.395715  |
| C         | -0.634252 | 0.000167  | 1.263222  |
| C         | -1.382241 | 0.000047  | 2.467510  |
| C         | -0.773802 | -0.000131 | 3.716169  |
| C         | -1.368973 | 0.000391  | 0.000000  |
| C         | -0.634252 | 0.000167  | -1.263222 |
| C         | 0.778610  | 0.000078  | -1.395715 |
| C         | 1.386090  | -0.000069 | -2.648877 |
| H         | 2.477634  | -0.000116 | -2.710185 |
| C         | 0.619357  | -0.000181 | -3.821814 |
| C         | -0.773802 | -0.000131 | -3.716169 |
| C         | -1.382241 | 0.000047  | -2.467510 |
| H         | 1.110576  | -0.000309 | 4.795706  |
| H         | 2.477634  | -0.000116 | 2.710185  |
| H         | -2.466576 | 0.000126  | 2.361459  |
| H         | -1.390064 | -0.000212 | 4.618294  |
| H         | 1.110576  | -0.000309 | -4.795706 |
| H         | -1.390064 | -0.000212 | -4.618294 |
| H         | -2.466576 | 0.000126  | -2.361459 |
| S         | 1.869515  | 0.000089  | 0.000000  |
| O         | -2.635834 | -0.000211 | 0.000000  |
| <b>1+</b> |           |           |           |
| 1 2       |           |           |           |
| C         | 0.000040  | 0.666678  | 3.783397  |
| C         | 0.000040  | 1.417097  | 2.617229  |
| C         | 0.000010  | 0.757749  | 1.369005  |
| C         | -0.000024 | -0.654118 | 1.289459  |
| C         | -0.000022 | -1.380118 | 2.474305  |
| C         | 0.000010  | -0.729597 | 3.713342  |
| C         | -0.000075 | -1.411123 | 0.000000  |
| C         | -0.000024 | -0.654118 | -1.289459 |
| C         | 0.000010  | 0.757749  | -1.369005 |
| C         | 0.000040  | 1.417097  | -2.617229 |
| H         | 0.000063  | 2.507884  | -2.656006 |
| C         | 0.000040  | 0.666678  | -3.783397 |
| C         | 0.000010  | -0.729597 | -3.713342 |
| C         | -0.000022 | -1.380118 | -2.474305 |

|          |           |           |           |
|----------|-----------|-----------|-----------|
| H        | 0.000064  | 1.170155  | 4.749836  |
| H        | 0.000063  | 2.507884  | 2.656006  |
| H        | -0.000050 | -2.468433 | 2.410065  |
| H        | 0.000012  | -1.320107 | 4.629837  |
| H        | 0.000064  | 1.170155  | -4.749836 |
| H        | 0.000012  | -1.320107 | -4.629837 |
| H        | -0.000050 | -2.468433 | -2.410065 |
| S        | 0.000024  | 1.794316  | 0.000000  |
| O        | -0.000097 | -2.619200 | 0.000000  |
| <b>2</b> |           |           |           |
| 0 1      |           |           |           |
| C        | -3.159314 | -0.191145 | -0.021886 |
| O        | -4.079836 | 0.572534  | -0.039938 |
| O        | -3.235443 | -1.505975 | -0.028624 |
| C        | -4.556800 | -2.040838 | -0.054260 |
| H        | -4.440883 | -3.127874 | -0.059593 |
| H        | -5.115630 | -1.719077 | 0.833630  |
| H        | -5.085535 | -1.706508 | -0.955813 |
| O        | -1.895895 | 0.282766  | 0.003355  |
| N        | -0.883393 | -0.659269 | 0.068232  |
| C        | 0.279987  | -0.122732 | 0.036123  |
| C        | 0.554542  | 1.341520  | -0.025088 |
| C        | -0.025896 | 2.227560  | 0.890698  |
| C        | 1.427193  | 1.833138  | -1.003901 |
| C        | 0.267122  | 3.587698  | 0.826898  |
| H        | -0.707319 | 1.846466  | 1.651736  |
| C        | 1.703487  | 3.197050  | -1.076446 |
| H        | 1.887823  | 1.141329  | -1.712193 |
| C        | 1.126536  | 4.074984  | -0.158832 |
| H        | -0.181339 | 4.272275  | 1.548169  |
| H        | 2.376098  | 3.573778  | -1.848175 |
| H        | 1.348424  | 5.142011  | -0.210056 |
| C        | 1.424375  | -1.077194 | 0.055783  |
| C        | 1.255076  | -2.394857 | -0.394716 |
| C        | 2.672175  | -0.678372 | 0.552326  |
| C        | 2.315839  | -3.293672 | -0.347919 |
| H        | 0.283404  | -2.700553 | -0.783498 |
| C        | 3.731305  | -1.583641 | 0.602227  |
| H        | 2.812274  | 0.342447  | 0.911035  |
| C        | 3.556791  | -2.891057 | 0.151249  |
| H        | 2.176651  | -4.314213 | -0.707542 |
| H        | 4.696707  | -1.263479 | 0.996707  |
| H        | 4.387951  | -3.596967 | 0.186068  |

T<sub>2</sub>



0 3

|   |           |           |           |
|---|-----------|-----------|-----------|
| C | 2.883995  | -0.863764 | 0.548337  |
| O | 3.481313  | -1.206472 | 1.521218  |
| O | 3.360511  | -0.679756 | -0.659059 |
| C | 4.755951  | -0.946468 | -0.812650 |
| H | 4.986098  | -0.740189 | -1.860948 |
| H | 5.339416  | -0.292967 | -0.152560 |
| H | 4.967039  | -1.995440 | -0.570649 |
| O | 1.544977  | -0.589869 | 0.642843  |
| N | 0.878121  | -0.378761 | -0.530500 |
| C | -0.431764 | 0.044457  | -0.231439 |
| C | -0.616407 | 1.477337  | -0.102830 |
| C | 0.370634  | 2.358575  | -0.605072 |
| C | -1.724368 | 2.037134  | 0.572666  |
| C | 0.234957  | 3.733322  | -0.464302 |
| H | 1.240597  | 1.945498  | -1.117838 |
| C | -1.848981 | 3.414607  | 0.710518  |
| H | -2.468725 | 1.382487  | 1.025682  |
| C | -0.877468 | 4.271426  | 0.187850  |
| H | 1.003116  | 4.394549  | -0.868224 |
| H | -2.708165 | 3.824649  | 1.243611  |
| H | -0.981188 | 5.351666  | 0.297903  |
| C | -1.453402 | -0.984002 | -0.160446 |
| C | -1.091683 | -2.312379 | 0.160489  |
| C | -2.807043 | -0.720361 | -0.468695 |
| C | -2.048216 | -3.318742 | 0.208461  |
| H | -0.051787 | -2.544891 | 0.392241  |
| C | -3.756609 | -1.734126 | -0.419629 |
| H | -3.105151 | 0.279541  | -0.784106 |
| C | -3.386890 | -3.035945 | -0.073551 |
| H | -1.747752 | -4.334234 | 0.470944  |
| H | -4.795244 | -1.508960 | -0.667053 |
| H | -4.135750 | -3.828035 | -0.033767 |

2-

-1 2

|   |          |           |           |
|---|----------|-----------|-----------|
| C | 3.072680 | -0.497635 | 0.259068  |
| O | 4.046276 | 0.122630  | 0.615999  |
| O | 3.124525 | -1.735036 | -0.234294 |
| C | 4.422529 | -2.300336 | -0.301409 |
| H | 4.298107 | -3.302266 | -0.724427 |
| H | 5.078230 | -1.697288 | -0.943870 |
| H | 4.872706 | -2.364316 | 0.698466  |
| O | 1.863682 | 0.014800  | 0.331356  |
| N | 0.770765 | -0.813297 | -0.089426 |

|                      |           |           |           |
|----------------------|-----------|-----------|-----------|
| C                    | -0.376673 | -0.105581 | -0.001819 |
| C                    | -0.436746 | 1.362926  | -0.017810 |
| C                    | 0.447402  | 2.123466  | -0.819161 |
| C                    | -1.360003 | 2.083128  | 0.772633  |
| C                    | 0.396718  | 3.512417  | -0.838099 |
| H                    | 1.171734  | 1.598822  | -1.442767 |
| C                    | -1.410870 | 3.473759  | 0.749598  |
| H                    | -2.036473 | 1.530339  | 1.427568  |
| C                    | -0.533508 | 4.204756  | -0.056415 |
| H                    | 1.088891  | 4.066023  | -1.476786 |
| H                    | -2.136445 | 3.994918  | 1.378250  |
| H                    | -0.570364 | 5.295165  | -0.071772 |
| C                    | -1.584382 | -0.913794 | -0.002411 |
| C                    | -1.508612 | -2.315605 | 0.241498  |
| C                    | -2.874142 | -0.404559 | -0.322111 |
| C                    | -2.635212 | -3.125584 | 0.199241  |
| H                    | -0.532439 | -2.740458 | 0.471794  |
| C                    | -3.994438 | -1.224078 | -0.355566 |
| H                    | -2.987764 | 0.652404  | -0.566378 |
| C                    | -3.898491 | -2.597217 | -0.091930 |
| H                    | -2.528700 | -4.194346 | 0.403436  |
| H                    | -4.963962 | -0.785099 | -0.604697 |
| H                    | -4.782251 | -3.236341 | -0.119168 |
| <b>2<sup>+</sup></b> |           |           |           |
| 1 2                  |           |           |           |
| C                    | 3.187266  | 0.037798  | 0.011034  |
| O                    | 3.997622  | 0.899092  | -0.016927 |
| O                    | 3.322057  | -1.249248 | 0.083177  |
| C                    | 4.676392  | -1.731020 | 0.135074  |
| H                    | 4.599469  | -2.817504 | 0.211612  |
| H                    | 5.204939  | -1.439304 | -0.779950 |
| H                    | 5.181590  | -1.310370 | 1.012151  |
| O                    | 1.829966  | 0.424445  | -0.034746 |
| N                    | 0.942178  | -0.534366 | -0.052730 |
| C                    | -0.322657 | -0.088265 | -0.053227 |
| C                    | -0.710401 | 1.321434  | 0.006085  |
| C                    | -0.081389 | 2.304625  | -0.784835 |
| C                    | -1.752658 | 1.691315  | 0.882363  |
| C                    | -0.509127 | 3.622039  | -0.711023 |
| H                    | 0.715291  | 2.030004  | -1.474137 |
| C                    | -2.152893 | 3.018504  | 0.968229  |
| H                    | -2.215560 | 0.937731  | 1.521994  |
| C                    | -1.536621 | 3.981694  | 0.167689  |
| H                    | -0.039583 | 4.377894  | -1.340620 |

|            |           |           |           |
|------------|-----------|-----------|-----------|
| H          | -2.943477 | 3.303849  | 1.662169  |
| H          | -1.855751 | 5.023017  | 0.229548  |
| C          | -1.292905 | -1.154376 | -0.078755 |
| C          | -0.911360 | -2.480435 | 0.285994  |
| C          | -2.630321 | -0.900310 | -0.496166 |
| C          | -1.846934 | -3.493398 | 0.270547  |
| H          | 0.115029  | -2.670236 | 0.596592  |
| C          | -3.551990 | -1.927533 | -0.517333 |
| H          | -2.909447 | 0.096260  | -0.838697 |
| C          | -3.165893 | -3.220527 | -0.127173 |
| H          | -1.565215 | -4.503627 | 0.566330  |
| H          | -4.571828 | -1.742190 | -0.853225 |
| H          | -3.898918 | -4.028556 | -0.147697 |
| <b>3ts</b> |           |           |           |
| 0 3        |           |           |           |
| C          | 2.495792  | -1.748357 | 0.476146  |
| O          | 3.072685  | -2.529824 | 1.189665  |
| O          | 3.091059  | -1.044801 | -0.489645 |
| C          | 4.478973  | -1.298076 | -0.660277 |
| H          | 4.802338  | -0.672482 | -1.497727 |
| H          | 5.034388  | -1.033899 | 0.249198  |
| H          | 4.653484  | -2.357692 | -0.888321 |
| O          | 1.210560  | -1.487041 | 0.610433  |
| N          | 0.529722  | -0.752212 | -0.798877 |
| C          | -0.449069 | 0.036972  | -0.402755 |
| C          | -0.116953 | 1.445845  | -0.143331 |
| C          | 1.078537  | 1.978524  | -0.665239 |
| C          | -0.929131 | 2.252298  | 0.673681  |
| C          | 1.435576  | 3.293183  | -0.394183 |
| H          | 1.717807  | 1.346725  | -1.284199 |
| C          | -0.562127 | 3.567657  | 0.941894  |
| H          | -1.832275 | 1.838398  | 1.122688  |
| C          | 0.614012  | 4.092961  | 0.405060  |
| H          | 2.358935  | 3.699936  | -0.808408 |
| H          | -1.194385 | 4.183970  | 1.582279  |
| H          | 0.895247  | 5.125779  | 0.615962  |
| C          | -1.789222 | -0.550660 | -0.245587 |
| C          | -1.906638 | -1.890480 | 0.165573  |
| C          | -2.947713 | 0.181588  | -0.559580 |
| C          | -3.163538 | -2.473634 | 0.287488  |
| H          | -1.003522 | -2.452929 | 0.407096  |
| C          | -4.199771 | -0.413147 | -0.443557 |
| H          | -2.862559 | 1.207573  | -0.920270 |
| C          | -4.310959 | -1.737478 | -0.014323 |

|          |           |           |           |
|----------|-----------|-----------|-----------|
| H        | -3.249113 | -3.508580 | 0.620808  |
| H        | -5.094220 | 0.157529  | -0.696436 |
| H        | -5.295218 | -2.198697 | 0.079786  |
| <b>4</b> |           |           |           |
| 0 2      |           |           |           |
| C        | 0.538616  | 0.030440  | -0.000022 |
| O        | 0.627363  | 1.236087  | -0.000035 |
| O        | -0.549144 | -0.695702 | -0.000136 |
| C        | -1.789745 | 0.023683  | 0.000090  |
| H        | -2.573767 | -0.737233 | 0.001374  |
| H        | -1.859753 | 0.651198  | 0.896780  |
| H        | -1.860950 | 0.649285  | -0.897851 |
| O        | 1.646936  | -0.651383 | 0.000082  |
| <b>5</b> |           |           |           |
| 0 2      |           |           |           |
| N        | -0.000003 | 2.431762  | 0.000077  |
| C        | -0.000002 | 1.172933  | 0.000047  |
| C        | -1.301396 | 0.428735  | 0.035166  |
| C        | -2.424440 | 0.971381  | -0.601728 |
| C        | -1.417691 | -0.774973 | 0.740265  |
| C        | -3.649579 | 0.312291  | -0.538736 |
| H        | -2.324335 | 1.908806  | -1.150971 |
| C        | -2.647287 | -1.428199 | 0.805084  |
| H        | -0.546522 | -1.197265 | 1.244307  |
| C        | -3.762788 | -0.887845 | 0.164726  |
| H        | -4.519390 | 0.735773  | -1.042855 |
| H        | -2.733381 | -2.364132 | 1.358886  |
| H        | -4.722555 | -1.404515 | 0.212803  |
| C        | 1.301394  | 0.428743  | -0.035106 |
| C        | 2.424440  | 0.971370  | 0.601799  |
| C        | 1.417689  | -0.774937 | -0.740253 |
| C        | 3.649581  | 0.312287  | 0.538773  |
| H        | 2.324336  | 1.908774  | 1.151076  |
| C        | 2.647287  | -1.428156 | -0.805106 |
| H        | 0.546518  | -1.197214 | -1.244304 |
| C        | 3.762790  | -0.887821 | -0.164736 |
| H        | 4.519394  | 0.735754  | 1.042902  |
| H        | 2.733381  | -2.364067 | -1.358945 |
| H        | 4.722559  | -1.404485 | -0.212841 |
| <b>6</b> |           |           |           |
| 0 1      |           |           |           |
| C        | 2.259819  | 0.267145  | 0.000000  |
| C        | 1.782003  | -1.042183 | 0.000000  |
| C        | 0.408672  | -1.283560 | 0.000000  |

|   |           |           |          |
|---|-----------|-----------|----------|
| C | -0.512196 | -0.226094 | 0.000000 |
| C | -0.016227 | 1.087845  | 0.000000 |
| C | 1.353807  | 1.330856  | 0.000000 |
| H | 3.333514  | 0.460830  | 0.000000 |
| H | 2.479981  | -1.880843 | 0.000000 |
| H | 0.037468  | -2.311024 | 0.000000 |
| H | -0.707509 | 1.932074  | 0.000000 |
| H | 1.719816  | 2.358919  | 0.000000 |
| C | -1.956082 | -0.536569 | 0.000000 |
| H | -2.193479 | -1.605399 | 0.000000 |
| C | -2.964472 | 0.340562  | 0.000000 |
| H | -3.999913 | -0.003267 | 0.000000 |
| H | -2.801818 | 1.420697  | 0.000000 |

7ts

0 2

|   |           |           |           |
|---|-----------|-----------|-----------|
| C | 4.336940  | -0.742335 | -0.398461 |
| C | 3.437574  | -1.592300 | 0.243438  |
| C | 2.175983  | -1.125159 | 0.607581  |
| C | 1.788452  | 0.195927  | 0.336592  |
| C | 2.706201  | 1.041517  | -0.309592 |
| C | 3.965693  | 0.577085  | -0.672264 |
| H | 5.325689  | -1.103306 | -0.685653 |
| H | 3.718167  | -2.623905 | 0.461870  |
| H | 1.472012  | -1.792507 | 1.109611  |
| H | 2.435425  | 2.075521  | -0.529029 |
| H | 4.665993  | 1.248509  | -1.171607 |
| C | 0.443288  | 0.639470  | 0.738334  |
| H | -0.160929 | -0.103471 | 1.268577  |
| C | -0.106375 | 1.844186  | 0.511074  |
| C | -2.784971 | -0.009357 | -0.167156 |
| O | -1.782731 | 0.216761  | -0.996980 |
| O | -3.817229 | -0.489874 | -0.836519 |
| C | -4.998709 | -0.737287 | -0.070091 |
| H | -5.724233 | -1.160996 | -0.769441 |
| H | -5.377662 | 0.201682  | 0.352549  |
| H | -4.786923 | -1.445390 | 0.740381  |
| O | -2.732575 | 0.205331  | 1.015478  |
| H | -1.113856 | 2.055878  | 0.869312  |
| H | 0.422137  | 2.639760  | -0.019133 |

7ts-1

0 2

|   |           |           |           |
|---|-----------|-----------|-----------|
| C | -2.709516 | -0.871926 | -0.252508 |
| C | -2.120494 | -0.898739 | 1.012215  |
| C | -1.162599 | 0.052509  | 1.352283  |

|       |           |           |           |
|-------|-----------|-----------|-----------|
| C     | -0.773650 | 1.041943  | 0.433802  |
| C     | -1.377325 | 1.058467  | -0.836218 |
| C     | -2.338280 | 0.112094  | -1.172605 |
| H     | -3.461131 | -1.615657 | -0.521680 |
| H     | -2.407508 | -1.664852 | 1.734123  |
| H     | -0.688466 | 0.025262  | 2.335773  |
| H     | -1.094656 | 1.820453  | -1.563802 |
| H     | -2.800751 | 0.137844  | -2.160216 |
| C     | 0.310965  | 1.951723  | 0.804983  |
| H     | 0.628283  | 1.903831  | 1.850440  |
| C     | 1.007873  | 2.741117  | -0.042059 |
| C     | 1.753474  | -0.423306 | -0.223365 |
| O     | 2.155488  | -0.386232 | 0.912151  |
| O     | 1.218857  | -1.492737 | -0.810967 |
| C     | 1.183650  | -2.676581 | -0.019923 |
| H     | 0.762013  | -3.455717 | -0.661728 |
| H     | 0.546397  | -2.521727 | 0.861243  |
| H     | 2.194299  | -2.954650 | 0.306524  |
| O     | 1.762021  | 0.581242  | -1.069839 |
| H     | 0.750292  | 2.834022  | -1.096893 |
| H     | 1.835710  | 3.349205  | 0.325831  |
| 7ts-2 |           |           |           |
| 0 2   |           |           |           |
| C     | 2.724126  | -1.965854 | 0.101579  |
| C     | 3.359236  | -1.001840 | -0.679267 |
| C     | 2.870330  | 0.303638  | -0.708152 |
| C     | 1.742868  | 0.670625  | 0.041108  |
| C     | 1.110781  | -0.311414 | 0.823093  |
| C     | 1.597570  | -1.614380 | 0.851142  |
| H     | 3.102752  | -2.988855 | 0.127821  |
| H     | 4.238429  | -1.265876 | -1.269277 |
| H     | 3.368763  | 1.057607  | -1.321722 |
| H     | 0.224309  | -0.056261 | 1.406424  |
| H     | 1.095154  | -2.365353 | 1.463263  |
| C     | 1.265487  | 2.063626  | -0.023759 |
| H     | 1.840953  | 2.715282  | -0.689396 |
| C     | 0.219960  | 2.582628  | 0.635092  |
| C     | -2.253860 | 0.217012  | -0.170966 |
| O     | -1.532470 | 0.972155  | -0.975729 |
| O     | -3.029738 | -0.591468 | -0.858699 |
| C     | -3.863738 | -1.466581 | -0.091444 |
| H     | -4.430936 | -2.050762 | -0.820229 |
| H     | -4.539608 | -0.881314 | 0.543890  |
| H     | -3.246180 | -2.123742 | 0.532901  |

|     |           |           |           |
|-----|-----------|-----------|-----------|
| O   | -2.168173 | 0.303272  | 1.026973  |
| H   | -0.399522 | 1.990284  | 1.311345  |
| H   | -0.047635 | 3.632570  | 0.504073  |
| 8   |           |           |           |
| 0 2 |           |           |           |
| C   | 3.658497  | -1.132394 | 0.091434  |
| C   | 3.496444  | -0.182435 | 1.106801  |
| C   | 2.408606  | 0.677198  | 1.092241  |
| C   | 1.440946  | 0.617250  | 0.055924  |
| C   | 1.620401  | -0.357661 | -0.960857 |
| C   | 2.714005  | -1.212881 | -0.937349 |
| H   | 4.514949  | -1.807761 | 0.103149  |
| H   | 4.228830  | -0.116142 | 1.912970  |
| H   | 2.284446  | 1.418261  | 1.884708  |
| H   | 0.881585  | -0.446926 | -1.758814 |
| H   | 2.833810  | -1.955741 | -1.727779 |
| C   | 0.342033  | 1.521174  | 0.061013  |
| H   | 0.256788  | 2.230908  | 0.884640  |
| C   | -0.707757 | 1.537297  | -0.998167 |
| C   | -2.282757 | 0.093978  | -0.042807 |
| O   | -1.455077 | 0.307101  | -1.059813 |
| O   | -2.880333 | -1.076437 | -0.213746 |
| C   | -3.815345 | -1.441735 | 0.794529  |
| H   | -4.235899 | -2.402442 | 0.484059  |
| H   | -4.607730 | -0.686635 | 0.876236  |
| H   | -3.313044 | -1.542070 | 1.765452  |
| O   | -2.466829 | 0.843950  | 0.878433  |
| H   | -1.406745 | 2.367381  | -0.838086 |
| H   | -0.269518 | 1.625514  | -2.002082 |
| 8-1 |           |           |           |
| 0 2 |           |           |           |
| C   | 3.810912  | -1.300842 | 0.090692  |
| C   | 4.050477  | -0.052872 | -0.496128 |
| C   | 3.039922  | 0.894507  | -0.559800 |
| C   | 1.749247  | 0.624471  | -0.035571 |
| C   | 1.525834  | -0.649279 | 0.549535  |
| C   | 2.544541  | -1.590115 | 0.609738  |
| H   | 4.606760  | -2.045083 | 0.141827  |
| H   | 5.035935  | 0.176846  | -0.904642 |
| H   | 3.228532  | 1.868202  | -1.017215 |
| H   | 0.538598  | -0.895204 | 0.943388  |
| H   | 2.353466  | -2.563841 | 1.063876  |
| C   | 0.731984  | 1.616462  | -0.103055 |
| H   | 0.967442  | 2.568957  | -0.579903 |

|   |           |           |           |
|---|-----------|-----------|-----------|
| C | -0.637645 | 1.417186  | 0.443014  |
| C | -2.554754 | 0.136275  | 0.047551  |
| O | -3.133997 | 0.657267  | 0.963522  |
| O | -3.051766 | -0.803557 | -0.743685 |
| C | -4.384443 | -1.209629 | -0.454645 |
| H | -4.636286 | -1.972823 | -1.196418 |
| H | -5.072262 | -0.357965 | -0.534976 |
| H | -4.447434 | -1.627861 | 0.558414  |
| O | -1.313216 | 0.410068  | -0.335008 |
| H | -0.615218 | 1.077295  | 1.491876  |
| H | -1.224153 | 2.344272  | 0.407153  |

8-2

0 2

|   |           |           |           |
|---|-----------|-----------|-----------|
| C | 3.547199  | -1.325016 | -0.094662 |
| C | 3.715189  | -0.122813 | -0.791854 |
| C | 2.729016  | 0.850090  | -0.751965 |
| C | 1.534771  | 0.658535  | -0.006136 |
| C | 1.381625  | -0.570974 | 0.688843  |
| C | 2.375456  | -1.539321 | 0.638569  |
| H | 4.322505  | -2.091636 | -0.128183 |
| H | 4.624991  | 0.051233  | -1.368699 |
| H | 2.863663  | 1.788167  | -1.294837 |
| H | 0.460658  | -0.770289 | 1.238200  |
| H | 2.235049  | -2.479994 | 1.173747  |
| C | 0.562958  | 1.697599  | 0.020595  |
| H | 0.749677  | 2.575180  | -0.602302 |
| C | -0.704939 | 1.682209  | 0.803834  |
| C | -2.272709 | 0.042844  | 0.113879  |
| O | -1.825674 | 1.284233  | -0.015810 |
| O | -3.259501 | -0.145206 | -0.750316 |
| C | -3.862489 | -1.434037 | -0.726711 |
| H | -4.629285 | -1.423815 | -1.506456 |
| H | -4.318779 | -1.625878 | 0.253246  |
| H | -3.115694 | -2.210963 | -0.934546 |
| O | -1.867635 | -0.784156 | 0.889589  |
| H | -0.651944 | 1.018755  | 1.675130  |
| H | -0.954831 | 2.695582  | 1.140640  |

8-3

0 2

|   |           |           |           |
|---|-----------|-----------|-----------|
| C | -3.485897 | -1.378201 | -0.083267 |
| C | -3.708466 | -0.171925 | -0.757699 |
| C | -2.755768 | 0.833965  | -0.721121 |
| C | -1.541093 | 0.671492  | -0.002136 |
| C | -1.333126 | -0.561973 | 0.670972  |



|     |           |           |           |
|-----|-----------|-----------|-----------|
| C   | -2.294056 | -1.563118 | 0.624884  |
| H   | -4.235119 | -2.170463 | -0.114144 |
| H   | -4.635054 | -0.020986 | -1.314012 |
| H   | -2.932916 | 1.774851  | -1.246719 |
| H   | -0.398889 | -0.736334 | 1.206627  |
| H   | -2.112368 | -2.505385 | 1.144618  |
| C   | -0.601092 | 1.739456  | 0.023859  |
| H   | -0.831791 | 2.627870  | -0.567833 |
| C   | 0.695708  | 1.726039  | 0.758959  |
| C   | 2.261662  | 0.060464  | 0.114663  |
| O   | 1.926175  | -0.707535 | 0.979264  |
| O   | 3.199068  | -0.178970 | -0.790979 |
| C   | 3.822111  | -1.455906 | -0.710835 |
| H   | 4.314718  | -1.583080 | 0.261875  |
| H   | 4.560046  | -1.483658 | -1.517475 |
| H   | 3.079586  | -2.253015 | -0.845662 |
| O   | 1.773767  | 1.275854  | -0.091286 |
| H   | 0.976005  | 2.743905  | 1.055291  |
| H   | 0.663796  | 1.089743  | 1.651770  |
| 8-4 |           |           |           |
| 0 2 |           |           |           |
| C   | -3.707973 | -0.218465 | -0.833618 |
| C   | -3.366009 | 1.103853  | -0.527257 |
| C   | -2.182399 | 1.383748  | 0.138743  |
| C   | -1.295680 | 0.345029  | 0.524802  |
| C   | -1.658868 | -0.988738 | 0.199790  |
| C   | -2.846730 | -1.257607 | -0.466153 |
| H   | -4.638558 | -0.437065 | -1.358695 |
| H   | -4.032350 | 1.919372  | -0.812594 |
| H   | -1.919507 | 2.416575  | 0.377217  |
| H   | -0.988711 | -1.808753 | 0.460493  |
| H   | -3.106076 | -2.289751 | -0.707403 |
| C   | -0.092437 | 0.657782  | 1.217219  |
| H   | 0.127773  | 1.704902  | 1.428424  |
| C   | 0.882335  | -0.376052 | 1.671650  |
| C   | 2.246322  | -0.591788 | -0.293599 |
| O   | 2.661406  | -1.177005 | -1.253436 |
| O   | 2.551708  | 0.664679  | 0.023758  |
| C   | 3.425924  | 1.334743  | -0.878638 |
| H   | 4.385233  | 0.805883  | -0.942822 |
| H   | 3.569600  | 2.339749  | -0.472161 |
| H   | 2.974328  | 1.385358  | -1.877282 |
| O   | 1.424171  | -1.155302 | 0.585604  |
| H   | 1.704967  | 0.081830  | 2.233411  |

|     |           |           |           |
|-----|-----------|-----------|-----------|
| H   | 0.398114  | -1.132119 | 2.306366  |
| 8-5 |           |           |           |
| 0 2 |           |           |           |
| C   | 3.526335  | 0.828717  | -0.010354 |
| C   | 3.361012  | -0.190537 | -0.954979 |
| C   | 2.214762  | -0.970962 | -0.948211 |
| C   | 1.184677  | -0.760930 | 0.007544  |
| C   | 1.373212  | 0.281222  | 0.954456  |
| C   | 2.524509  | 1.055704  | 0.940009  |
| H   | 4.427977  | 1.442575  | -0.015216 |
| H   | 4.135846  | -0.372941 | -1.701423 |
| H   | 2.090062  | -1.765089 | -1.687433 |
| H   | 0.600662  | 0.488761  | 1.694838  |
| H   | 2.646271  | 1.850622  | 1.677788  |
| C   | 0.028800  | -1.588371 | -0.023730 |
| H   | -0.039230 | -2.339610 | -0.814745 |
| C   | -1.119308 | -1.531524 | 0.922463  |
| C   | -2.552195 | 0.039678  | -0.192101 |
| O   | -3.522351 | 0.348330  | -0.824934 |
| O   | -1.571096 | 0.869255  | 0.153982  |
| C   | -1.690793 | 2.211106  | -0.304148 |
| H   | -2.576690 | 2.686712  | 0.135869  |
| H   | -1.773989 | 2.233010  | -1.397926 |
| H   | -0.779362 | 2.722630  | 0.019620  |
| O   | -2.351736 | -1.196627 | 0.252252  |
| H   | -1.322412 | -2.525812 | 1.341918  |
| H   | -0.953732 | -0.833149 | 1.750623  |
| 8-6 |           |           |           |
| 0 2 |           |           |           |
| C   | 3.926232  | -1.113591 | -0.131770 |
| C   | 4.097381  | 0.223318  | 0.245886  |
| C   | 3.009950  | 1.082768  | 0.286144  |
| C   | 1.708084  | 0.632285  | -0.052776 |
| C   | 1.555478  | -0.728124 | -0.427107 |
| C   | 2.650621  | -1.580204 | -0.466245 |
| H   | 4.782631  | -1.788833 | -0.161378 |
| H   | 5.089908  | 0.592072  | 0.510674  |
| H   | 3.145740  | 2.125902  | 0.580784  |
| H   | 0.563953  | -1.111633 | -0.673206 |
| H   | 2.511764  | -2.623288 | -0.755874 |
| C   | 0.609511  | 1.536021  | -0.014575 |
| H   | 0.797156  | 2.567361  | 0.288545  |
| C   | -0.782240 | 1.145403  | -0.368305 |
| C   | -2.496433 | -0.283698 | 0.512454  |

|     |           |           |           |
|-----|-----------|-----------|-----------|
| O   | -2.944670 | -1.074792 | 1.293662  |
| O   | -3.152853 | 0.210495  | -0.535558 |
| C   | -4.488005 | -0.254033 | -0.705067 |
| H   | -5.097638 | 0.014331  | 0.167221  |
| H   | -4.498577 | -1.344150 | -0.830520 |
| H   | -4.869980 | 0.238298  | -1.604026 |
| O   | -1.263595 | 0.199789  | 0.610300  |
| H   | -1.447723 | 2.017464  | -0.380757 |
| H   | -0.831760 | 0.667673  | -1.360522 |
| 9ts |           |           |           |
| 0 1 |           |           |           |
| C   | -0.067323 | 1.785798  | 2.816561  |
| C   | -0.263116 | 0.408421  | 2.676052  |
| C   | -0.814046 | -0.110898 | 1.510813  |
| C   | -1.173325 | 0.742061  | 0.438154  |
| C   | -0.967180 | 2.133954  | 0.602043  |
| C   | -0.427852 | 2.644930  | 1.773033  |
| H   | 0.361532  | 2.187451  | 3.735914  |
| H   | 0.012594  | -0.265680 | 3.488917  |
| H   | -0.975650 | -1.187013 | 1.425944  |
| H   | -1.236657 | 2.805635  | -0.215874 |
| H   | -0.275169 | 3.720880  | 1.873980  |
| C   | -1.698821 | 0.238234  | -0.789925 |
| C   | -2.143360 | -1.175791 | -0.956181 |
| C   | -4.419425 | -0.943202 | -0.447794 |
| O   | -4.607067 | -0.241981 | -1.406746 |
| O   | -5.344324 | -1.295963 | 0.435530  |
| C   | -6.650875 | -0.792037 | 0.186139  |
| H   | -6.644677 | 0.305508  | 0.179587  |
| H   | -7.280955 | -1.163203 | 0.999445  |
| H   | -7.024351 | -1.154675 | -0.780450 |
| O   | -3.263069 | -1.494033 | -0.104569 |
| H   | -2.415824 | -1.379162 | -1.999226 |
| H   | -1.363127 | -1.882506 | -0.651042 |
| H   | -1.906655 | 0.946976  | -1.592493 |
| N   | 0.681798  | -0.989189 | -1.632327 |
| C   | 1.668283  | -0.499075 | -1.019796 |
| C   | 2.679583  | -1.438512 | -0.431019 |
| C   | 2.247412  | -2.626051 | 0.170896  |
| C   | 4.049780  | -1.163676 | -0.518504 |
| C   | 3.176694  | -3.528125 | 0.685004  |
| H   | 1.177565  | -2.829952 | 0.239372  |
| C   | 4.975989  | -2.071667 | -0.008883 |
| H   | 4.389999  | -0.240906 | -0.992304 |

|       |           |           |           |
|-------|-----------|-----------|-----------|
| C     | 4.541451  | -3.252767 | 0.594622  |
| H     | 2.833511  | -4.448511 | 1.159674  |
| H     | 6.042760  | -1.856189 | -0.084194 |
| H     | 5.268801  | -3.959506 | 0.997153  |
| C     | 1.850067  | 0.979857  | -0.889475 |
| C     | 1.342671  | 1.824392  | -1.885463 |
| C     | 2.490272  | 1.528806  | 0.226277  |
| C     | 1.483462  | 3.204008  | -1.768772 |
| H     | 0.845742  | 1.384946  | -2.752069 |
| C     | 2.627048  | 2.911452  | 0.340276  |
| H     | 2.867992  | 0.874033  | 1.013741  |
| C     | 2.127861  | 3.749335  | -0.656213 |
| H     | 1.094663  | 3.858278  | -2.550546 |
| H     | 3.118404  | 3.335995  | 1.217124  |
| H     | 2.241087  | 4.831056  | -0.567149 |
| 9ts-1 |           |           |           |
| 0 1   |           |           |           |
| C     | -5.496548 | -1.726982 | 0.279322  |
| C     | -4.808849 | -2.020194 | -0.901743 |
| C     | -3.618420 | -1.371463 | -1.205323 |
| C     | -3.075892 | -0.402435 | -0.325841 |
| C     | -3.790677 | -0.115865 | 0.863981  |
| C     | -4.978895 | -0.768668 | 1.158735  |
| H     | -6.430176 | -2.240392 | 0.512731  |
| H     | -5.207580 | -2.764396 | -1.593382 |
| H     | -3.098955 | -1.617324 | -2.133061 |
| H     | -3.389123 | 0.632377  | 1.551608  |
| H     | -5.512207 | -0.532158 | 2.081057  |
| C     | -1.847279 | 0.267052  | -0.598607 |
| C     | -1.115100 | 0.120713  | -1.887259 |
| C     | 0.284173  | 1.995089  | -1.819152 |
| O     | -0.646211 | 2.755441  | -1.850118 |
| O     | 1.562586  | 2.345176  | -1.784507 |
| C     | 1.811804  | 3.745778  | -1.747413 |
| H     | 2.898403  | 3.859946  | -1.696538 |
| H     | 1.336804  | 4.195196  | -0.865160 |
| H     | 1.419529  | 4.228712  | -2.651697 |
| O     | 0.202088  | 0.668920  | -1.821300 |
| H     | -0.965987 | -0.939323 | -2.135324 |
| H     | -1.662403 | 0.603913  | -2.716036 |
| H     | -1.512801 | 1.047429  | 0.086979  |
| N     | -0.159643 | -1.686977 | 0.191108  |
| C     | 0.871922  | -1.095121 | 0.609637  |
| C     | 0.760597  | 0.166239  | 1.407067  |

|       |           |           |           |
|-------|-----------|-----------|-----------|
| C     | 1.614338  | 1.241935  | 1.140428  |
| C     | -0.250206 | 0.298124  | 2.366609  |
| C     | 1.440905  | 2.450154  | 1.815282  |
| H     | 2.394463  | 1.138015  | 0.384425  |
| C     | -0.411003 | 1.502690  | 3.048038  |
| H     | -0.911730 | -0.547511 | 2.564915  |
| C     | 0.429993  | 2.581925  | 2.768432  |
| H     | 2.102504  | 3.291042  | 1.600051  |
| H     | -1.195998 | 1.602108  | 3.799356  |
| H     | 0.300502  | 3.526585  | 3.298719  |
| C     | 2.225127  | -1.650073 | 0.282410  |
| C     | 2.428818  | -2.290760 | -0.945659 |
| C     | 3.278555  | -1.556127 | 1.199528  |
| C     | 3.673794  | -2.834671 | -1.251574 |
| H     | 1.605838  | -2.343940 | -1.660042 |
| C     | 4.521125  | -2.107488 | 0.892028  |
| H     | 3.121563  | -1.055628 | 2.156989  |
| C     | 4.720627  | -2.746314 | -0.332509 |
| H     | 3.829879  | -3.325017 | -2.213587 |
| H     | 5.337611  | -2.036618 | 1.612133  |
| H     | 5.696212  | -3.171707 | -0.572990 |
| 9ts-2 |           |           |           |
| 0 1   |           |           |           |
| C     | -5.201460 | 0.127142  | -0.222449 |
| C     | -4.409621 | -0.046048 | 0.914922  |
| C     | -3.195918 | -0.717958 | 0.836149  |
| C     | -2.741696 | -1.249861 | -0.396074 |
| C     | -3.561772 | -1.067581 | -1.538150 |
| C     | -4.766666 | -0.387189 | -1.450969 |
| H     | -6.151854 | 0.658572  | -0.155052 |
| H     | -4.740507 | 0.355468  | 1.874674  |
| H     | -2.589945 | -0.829722 | 1.737497  |
| H     | -3.222696 | -1.465751 | -2.497051 |
| H     | -5.379470 | -0.255263 | -2.344435 |
| C     | -1.499272 | -1.936484 | -0.511675 |
| C     | -0.606976 | -2.149908 | 0.660040  |
| C     | 1.804221  | -2.319574 | 0.624425  |
| O     | 2.822231  | -2.831356 | 0.250561  |
| O     | 1.741964  | -1.295336 | 1.476227  |
| C     | 2.988912  | -0.849832 | 2.005692  |
| H     | 2.748435  | -0.059039 | 2.723312  |
| H     | 3.627674  | -0.457228 | 1.203869  |
| H     | 3.501111  | -1.678946 | 2.510206  |
| O     | 0.613882  | -2.745963 | 0.223825  |

|   |           |           |           |
|---|-----------|-----------|-----------|
| H | -0.411072 | -1.202294 | 1.181394  |
| H | -1.066088 | -2.838830 | 1.393195  |
| H | -1.248366 | -2.452745 | -1.436590 |
| N | 0.376083  | -0.463196 | -1.711730 |
| C | 0.733479  | 0.477392  | -0.950735 |
| C | 2.187402  | 0.838290  | -0.853253 |
| C | 2.608260  | 2.025939  | -0.245041 |
| C | 3.143827  | -0.034654 | -1.394750 |
| C | 3.968715  | 2.325750  | -0.160525 |
| H | 1.874258  | 2.723560  | 0.159657  |
| C | 4.498236  | 0.271453  | -1.314796 |
| H | 2.815263  | -0.964587 | -1.860880 |
| C | 4.915014  | 1.450485  | -0.691216 |
| H | 4.287940  | 3.251888  | 0.319723  |
| H | 5.233361  | -0.419079 | -1.730503 |
| H | 5.978084  | 1.685846  | -0.621321 |
| C | -0.300781 | 1.247282  | -0.182334 |
| C | -1.415014 | 1.748682  | -0.865118 |
| C | -0.181677 | 1.454430  | 1.197088  |
| C | -2.389911 | 2.468647  | -0.178901 |
| H | -1.505262 | 1.574553  | -1.938476 |
| C | -1.166442 | 2.165524  | 1.882382  |
| H | 0.681821  | 1.052048  | 1.730563  |
| C | -2.265917 | 2.679229  | 1.194351  |
| H | -3.255226 | 2.858377  | -0.717306 |
| H | -1.071477 | 2.320760  | 2.958144  |
| H | -3.032837 | 3.239090  | 1.732211  |

9ts-3

0 1

|   |           |           |           |
|---|-----------|-----------|-----------|
| C | 5.198005  | -0.320192 | -1.641031 |
| C | 4.897411  | -0.497698 | -0.288178 |
| C | 3.766605  | 0.089400  | 0.268507  |
| C | 2.897235  | 0.881011  | -0.520135 |
| C | 3.228846  | 1.060144  | -1.886239 |
| C | 4.354797  | 0.465385  | -2.435957 |
| H | 6.084594  | -0.785714 | -2.073534 |
| H | 5.553325  | -1.102535 | 0.340689  |
| H | 3.556623  | -0.068504 | 1.327358  |
| H | 2.568312  | 1.666761  | -2.509403 |
| H | 4.582361  | 0.612181  | -3.493118 |
| C | 1.702881  | 1.485408  | -0.013762 |
| C | 1.277923  | 1.412586  | 1.415544  |
| C | -0.835180 | 2.421470  | 1.144208  |
| O | -0.379606 | 3.472136  | 0.777519  |

|   |           |           |           |
|---|-----------|-----------|-----------|
| O | -2.125687 | 2.115031  | 1.187589  |
| C | -3.019411 | 3.145797  | 0.785449  |
| H | -2.766326 | 3.502802  | -0.221700 |
| H | -2.972126 | 3.989480  | 1.486819  |
| H | -4.018995 | 2.700751  | 0.793633  |
| O | -0.142104 | 1.378419  | 1.576530  |
| H | 1.622331  | 0.488047  | 1.896689  |
| H | 1.674653  | 2.274889  | 1.981474  |
| H | 1.226367  | 2.245925  | -0.627603 |
| N | -0.301793 | 0.414520  | -1.257071 |
| C | -0.873546 | -0.530139 | -0.646164 |
| C | -2.323966 | -0.798908 | -0.925754 |
| C | -3.153680 | 0.254416  | -1.331988 |
| C | -2.852753 | -2.089774 | -0.812036 |
| C | -4.495490 | 0.019814  | -1.617742 |
| H | -2.732238 | 1.257375  | -1.411547 |
| C | -4.196650 | -2.322213 | -1.103771 |
| H | -2.209888 | -2.914689 | -0.499810 |
| C | -5.019692 | -1.269809 | -1.504092 |
| H | -5.137176 | 0.846618  | -1.926359 |
| H | -4.602189 | -3.331285 | -1.016439 |
| H | -6.072385 | -1.453617 | -1.724653 |
| C | -0.150982 | -1.386309 | 0.347265  |
| C | 1.119199  | -1.885275 | 0.047757  |
| C | -0.726477 | -1.646943 | 1.597547  |
| C | 1.812990  | -2.639758 | 0.994992  |
| H | 1.563625  | -1.674963 | -0.926901 |
| C | -0.025760 | -2.387935 | 2.544607  |
| H | -1.713425 | -1.241943 | 1.829574  |
| C | 1.244473  | -2.887513 | 2.243789  |
| H | 2.804582  | -3.027244 | 0.755231  |
| H | -0.470490 | -2.575501 | 3.523126  |
| H | 1.789505  | -3.472955 | 2.985979  |

9ts-4

0 1

|   |           |          |           |
|---|-----------|----------|-----------|
| C | -2.462836 | 4.314297 | 0.526792  |
| C | -1.700606 | 4.377606 | -0.645241 |
| C | -1.285910 | 3.211444 | -1.272819 |
| C | -1.614024 | 1.941738 | -0.741717 |
| C | -2.395186 | 1.897190 | 0.436800  |
| C | -2.811024 | 3.069337 | 1.057680  |
| H | -2.788982 | 5.231253 | 1.019679  |
| H | -1.429211 | 5.346687 | -1.067257 |
| H | -0.681189 | 3.259345 | -2.180828 |

|     |           |           |           |
|-----|-----------|-----------|-----------|
| H   | -2.686241 | 0.933499  | 0.858459  |
| H   | -3.417006 | 3.015103  | 1.963867  |
| C   | -1.133513 | 0.757491  | -1.389445 |
| C   | -1.384260 | -0.611012 | -0.860142 |
| C   | -3.115937 | -2.178361 | -0.740475 |
| O   | -2.466243 | -2.895530 | -0.026144 |
| O   | -4.347788 | -2.427471 | -1.164547 |
| C   | -4.916549 | -3.650404 | -0.713058 |
| H   | -5.913381 | -3.705814 | -1.159781 |
| H   | -4.989677 | -3.658843 | 0.382279  |
| H   | -4.305423 | -4.502315 | -1.038385 |
| O   | -2.718820 | -1.012206 | -1.232695 |
| H   | -0.667680 | -1.335305 | -1.274485 |
| H   | -1.305655 | -0.651913 | 0.235786  |
| H   | -0.743035 | 0.852436  | -2.400471 |
| N   | 1.477353  | 0.878735  | -1.260800 |
| C   | 2.033140  | 0.241352  | -0.325129 |
| C   | 3.484623  | -0.123834 | -0.435769 |
| C   | 4.252715  | -0.355695 | 0.710918  |
| C   | 4.086119  | -0.200717 | -1.699327 |
| C   | 5.609426  | -0.657167 | 0.593356  |
| H   | 3.790032  | -0.291759 | 1.697298  |
| C   | 5.439276  | -0.504598 | -1.812078 |
| H   | 3.479402  | -0.024933 | -2.588770 |
| C   | 6.203713  | -0.732597 | -0.665629 |
| H   | 6.203393  | -0.833845 | 1.491186  |
| H   | 5.900256  | -0.569550 | -2.798739 |
| H   | 7.264304  | -0.972465 | -0.755097 |
| C   | 1.266577  | -0.151868 | 0.900782  |
| C   | 0.540540  | 0.813069  | 1.604808  |
| C   | 1.219954  | -1.493117 | 1.299921  |
| C   | -0.238081 | 0.435026  | 2.698603  |
| H   | 0.574800  | 1.855254  | 1.281202  |
| C   | 0.425861  | -1.868577 | 2.381191  |
| H   | 1.790102  | -2.243636 | 0.748179  |
| C   | -0.303579 | -0.904910 | 3.081475  |
| H   | -0.805241 | 1.191015  | 3.244132  |
| H   | 0.371375  | -2.917539 | 2.675236  |
| H   | -0.922242 | -1.200326 | 3.930209  |
| 10  |           |           |           |
| 0 1 |           |           |           |
| C   | 5.230130  | 1.845138  | 0.718184  |
| C   | 4.206254  | 2.659551  | 0.236240  |
| C   | 2.961991  | 2.113645  | -0.084312 |



|   |           |           |           |
|---|-----------|-----------|-----------|
| C | 2.731878  | 0.745341  | 0.078359  |
| C | 3.763129  | -0.067569 | 0.564760  |
| C | 5.005621  | 0.476876  | 0.881813  |
| H | 6.200803  | 2.275256  | 0.970294  |
| H | 4.374876  | 3.730568  | 0.110811  |
| H | 2.153550  | 2.746038  | -0.451440 |
| H | 3.583094  | -1.137924 | 0.699837  |
| H | 5.799098  | -0.167572 | 1.263659  |
| C | 1.406311  | 0.101204  | -0.283272 |
| C | 1.532468  | -0.580927 | -1.649977 |
| C | 0.283607  | -2.538826 | -1.374239 |
| O | 1.081372  | -3.000234 | -0.600820 |
| O | -0.813795 | -3.145439 | -1.799333 |
| C | -1.020438 | -4.460285 | -1.295516 |
| H | -1.990690 | -4.785173 | -1.682770 |
| H | -1.027220 | -4.453248 | -0.197953 |
| H | -0.226420 | -5.131799 | -1.648185 |
| O | 0.367704  | -1.344442 | -1.954801 |
| H | 1.610930  | 0.174806  | -2.440939 |
| H | 2.415538  | -1.233464 | -1.661917 |
| H | 1.209983  | -0.698967 | 0.447558  |
| N | 0.341913  | 1.074190  | -0.371800 |
| C | -0.815821 | 0.847602  | 0.108541  |
| C | -1.192706 | -0.379253 | 0.887803  |
| C | -2.123222 | -1.281898 | 0.361484  |
| C | -0.623324 | -0.627415 | 2.141858  |
| C | -2.467256 | -2.428515 | 1.077380  |
| H | -2.570824 | -1.088827 | -0.615936 |
| C | -0.968921 | -1.774026 | 2.855266  |
| H | 0.097524  | 0.081714  | 2.555659  |
| C | -1.889926 | -2.677133 | 2.323168  |
| H | -3.192486 | -3.129731 | 0.660435  |
| H | -0.518284 | -1.961152 | 3.831048  |
| H | -2.160903 | -3.573830 | 2.882730  |
| C | -1.886847 | 1.870803  | -0.104730 |
| C | -1.720604 | 2.856910  | -1.088363 |
| C | -3.047398 | 1.881224  | 0.679656  |
| C | -2.693393 | 3.832279  | -1.280447 |
| H | -0.815720 | 2.838519  | -1.696499 |
| C | -4.018268 | 2.865594  | 0.491734  |
| H | -3.190657 | 1.122553  | 1.450750  |
| C | -3.845054 | 3.840883  | -0.488554 |
| H | -2.556486 | 4.590961  | -2.052693 |
| H | -4.913506 | 2.868226  | 1.115355  |

|      |           |           |           |
|------|-----------|-----------|-----------|
| H    | -4.607104 | 4.607412  | -0.638583 |
| 10-1 |           |           |           |
| 0 1  |           |           |           |
| C    | -2.471982 | 1.576694  | 2.286062  |
| C    | -1.620599 | 0.522104  | 2.623078  |
| C    | -0.984499 | -0.210868 | 1.624286  |
| C    | -1.185214 | 0.107515  | 0.277234  |
| C    | -2.039155 | 1.161748  | -0.055096 |
| C    | -2.681785 | 1.894142  | 0.944750  |
| H    | -2.969869 | 2.150088  | 3.069739  |
| H    | -1.455926 | 0.267921  | 3.671539  |
| H    | -0.322529 | -1.038502 | 1.889262  |
| H    | -2.200938 | 1.411894  | -1.106440 |
| H    | -3.341418 | 2.720140  | 0.673302  |
| C    | -0.553639 | -0.726536 | -0.823609 |
| C    | -1.405259 | -1.967880 | -1.108492 |
| C    | -3.644023 | -1.527661 | -0.524462 |
| O    | -3.557858 | -2.021138 | 0.566483  |
| O    | -4.696083 | -0.864883 | -0.985682 |
| C    | -5.767210 | -0.705745 | -0.062995 |
| H    | -6.550301 | -0.159305 | -0.596349 |
| H    | -5.429504 | -0.133761 | 0.812054  |
| H    | -6.141282 | -1.683161 | 0.267909  |
| O    | -2.717433 | -1.562230 | -1.481013 |
| H    | -0.987406 | -2.519467 | -1.959532 |
| H    | -1.440197 | -2.621040 | -0.226608 |
| H    | -0.552319 | -0.116666 | -1.742297 |
| N    | 0.787742  | -1.195563 | -0.513447 |
| C    | 1.744594  | -0.363872 | -0.374332 |
| C    | 3.104989  | -0.880405 | -0.032642 |
| C    | 4.217758  | -0.030450 | -0.001629 |
| C    | 3.280263  | -2.244294 | 0.247274  |
| C    | 5.482593  | -0.534551 | 0.304111  |
| H    | 4.098228  | 1.031310  | -0.222277 |
| C    | 4.540473  | -2.744110 | 0.553927  |
| H    | 2.407053  | -2.896135 | 0.216951  |
| C    | 5.646722  | -1.889706 | 0.583124  |
| H    | 6.342505  | 0.136487  | 0.322370  |
| H    | 4.665234  | -3.805911 | 0.772163  |
| H    | 6.635823  | -2.283036 | 0.823548  |
| C    | 1.576742  | 1.120582  | -0.520934 |
| C    | 1.409315  | 1.694871  | -1.784110 |
| C    | 1.542959  | 1.933433  | 0.618262  |
| C    | 1.191613  | 3.067787  | -1.905939 |

|      |           |           |           |
|------|-----------|-----------|-----------|
| H    | 1.448608  | 1.064931  | -2.675741 |
| C    | 1.319433  | 3.302835  | 0.494960  |
| H    | 1.676738  | 1.483829  | 1.604794  |
| C    | 1.139725  | 3.871335  | -0.767448 |
| H    | 1.062208  | 3.510496  | -2.894846 |
| H    | 1.284854  | 3.929154  | 1.387683  |
| H    | 0.964333  | 4.943872  | -0.863676 |
| 10-2 |           |           |           |
| 0 1  |           |           |           |
| C    | -2.225277 | 1.825873  | 2.412286  |
| C    | -2.444367 | 2.127054  | 1.069119  |
| C    | -1.929186 | 1.294209  | 0.074389  |
| C    | -1.192990 | 0.157183  | 0.413541  |
| C    | -0.986780 | -0.145902 | 1.763287  |
| C    | -1.496862 | 0.684933  | 2.757133  |
| H    | -2.623927 | 2.477516  | 3.191385  |
| H    | -3.012079 | 3.017206  | 0.792783  |
| H    | -2.081235 | 1.541732  | -0.979500 |
| H    | -0.414212 | -1.036240 | 2.034099  |
| H    | -1.328334 | 0.442220  | 3.807627  |
| C    | -0.656621 | -0.760643 | -0.670120 |
| C    | -1.519448 | -2.018779 | -0.783443 |
| C    | -3.740245 | -1.666687 | -0.037603 |
| O    | -3.532700 | -2.101612 | 1.058827  |
| O    | -4.913524 | -1.155662 | -0.386677 |
| C    | -5.107628 | -0.630349 | -1.695471 |
| H    | -4.409132 | 0.193136  | -1.890418 |
| H    | -6.137746 | -0.262377 | -1.718892 |
| H    | -4.969689 | -1.411284 | -2.453687 |
| O    | -2.867817 | -1.646361 | -1.050568 |
| H    | -1.181621 | -2.632567 | -1.627740 |
| H    | -1.467613 | -2.605453 | 0.142788  |
| H    | -0.725331 | -0.221859 | -1.630133 |
| N    | 0.707347  | -1.216518 | -0.438284 |
| C    | 1.671856  | -0.383995 | -0.380734 |
| C    | 3.049613  | -0.896665 | -0.109493 |
| C    | 4.164549  | -0.051141 | -0.169038 |
| C    | 3.237747  | -2.253126 | 0.197044  |
| C    | 5.444244  | -0.552233 | 0.074196  |
| H    | 4.034884  | 1.004695  | -0.411236 |
| C    | 4.512750  | -2.749915 | 0.440891  |
| H    | 2.362597  | -2.901867 | 0.236245  |
| C    | 5.621119  | -1.899912 | 0.380094  |
| H    | 6.305365  | 0.115661  | 0.023746  |

|      |           |           |           |
|------|-----------|-----------|-----------|
| H    | 4.647605  | -3.805920 | 0.680158  |
| H    | 6.621704  | -2.291221 | 0.571368  |
| C    | 1.497334  | 1.096214  | -0.556660 |
| C    | 1.236042  | 1.632764  | -1.820379 |
| C    | 1.542952  | 1.941101  | 0.558206  |
| C    | 1.002080  | 3.000987  | -1.965045 |
| H    | 1.216160  | 0.977665  | -2.694367 |
| C    | 1.298502  | 3.304586  | 0.413299  |
| H    | 1.747452  | 1.520110  | 1.545320  |
| C    | 1.024205  | 3.835907  | -0.848357 |
| H    | 0.802040  | 3.415476  | -2.954468 |
| H    | 1.318937  | 3.955076  | 1.288986  |
| H    | 0.833538  | 4.904218  | -0.961577 |
| 10-3 |           |           |           |
| 0 1  |           |           |           |
| C    | 5.344996  | -0.789272 | -1.376586 |
| C    | 4.289456  | -1.694793 | -1.495844 |
| C    | 3.051962  | -1.410082 | -0.920574 |
| C    | 2.857352  | -0.215068 | -0.219407 |
| C    | 3.917653  | 0.688808  | -0.105152 |
| C    | 5.156476  | 0.404021  | -0.679820 |
| H    | 6.312105  | -1.011296 | -1.830571 |
| H    | 4.430516  | -2.628399 | -2.043090 |
| H    | 2.219626  | -2.108294 | -1.020840 |
| H    | 3.768496  | 1.628282  | 0.432913  |
| H    | 5.974584  | 1.120139  | -0.587057 |
| C    | 1.534294  | 0.084342  | 0.456225  |
| C    | 1.486517  | -0.620417 | 1.820586  |
| C    | -0.815701 | -1.091979 | 2.369780  |
| O    | -1.913172 | -0.704286 | 2.667555  |
| O    | -0.537016 | -2.321172 | 1.954782  |
| C    | -1.647414 | -3.210540 | 1.870945  |
| H    | -2.082520 | -3.367802 | 2.866209  |
| H    | -1.253183 | -4.150309 | 1.473242  |
| H    | -2.412141 | -2.799482 | 1.199656  |
| O    | 0.254410  | -0.307466 | 2.466502  |
| H    | 1.599645  | -1.704125 | 1.697842  |
| H    | 2.282624  | -0.234054 | 2.468737  |
| H    | 1.470168  | 1.168512  | 0.648321  |
| N    | 0.416339  | -0.422341 | -0.305420 |
| C    | -0.614955 | 0.295005  | -0.522543 |
| C    | -1.800761 | -0.345412 | -1.171441 |
| C    | -2.904031 | 0.412551  | -1.582427 |
| C    | -1.814601 | -1.734375 | -1.370782 |

|      |           |           |           |
|------|-----------|-----------|-----------|
| C    | -4.001904 | -0.206425 | -2.181441 |
| H    | -2.906393 | 1.493618  | -1.436317 |
| C    | -2.911488 | -2.350005 | -1.963925 |
| H    | -0.949454 | -2.313719 | -1.044916 |
| C    | -4.009383 | -1.586672 | -2.371825 |
| H    | -4.855071 | 0.395347  | -2.497926 |
| H    | -2.914096 | -3.431381 | -2.110718 |
| H    | -4.869542 | -2.070476 | -2.837391 |
| C    | -0.725531 | 1.751032  | -0.169601 |
| C    | -1.464479 | 2.156307  | 0.947279  |
| C    | -0.084488 | 2.706985  | -0.964408 |
| C    | -1.556675 | 3.511524  | 1.263508  |
| H    | -1.950919 | 1.404736  | 1.573605  |
| C    | -0.183672 | 4.061362  | -0.646277 |
| H    | 0.495846  | 2.386727  | -1.832928 |
| C    | -0.920132 | 4.464932  | 0.467682  |
| H    | -2.129318 | 3.823004  | 2.138601  |
| H    | 0.316867  | 4.803247  | -1.270366 |
| H    | -0.996945 | 5.524539  | 0.716496  |
| 10-4 |           |           |           |
| 0 1  |           |           |           |
| C    | -3.118223 | 0.584952  | 2.720153  |
| C    | -3.127204 | 1.453842  | 1.629567  |
| C    | -2.292392 | 1.212769  | 0.537371  |
| C    | -1.446980 | 0.099273  | 0.521903  |
| C    | -1.439870 | -0.767850 | 1.619778  |
| C    | -2.269928 | -0.524657 | 2.712984  |
| H    | -3.767631 | 0.773785  | 3.576529  |
| H    | -3.782655 | 2.326264  | 1.627982  |
| H    | -2.297781 | 1.896781  | -0.314790 |
| H    | -0.777206 | -1.635237 | 1.610947  |
| H    | -2.255975 | -1.205360 | 3.566025  |
| C    | -0.613046 | -0.185700 | -0.713387 |
| C    | -1.378753 | -1.088591 | -1.691688 |
| C    | -3.729603 | -0.592183 | -1.489574 |
| O    | -4.680623 | 0.095307  | -1.735187 |
| O    | -3.707099 | -1.569392 | -0.590657 |
| C    | -4.862998 | -1.680812 | 0.231060  |
| H    | -4.652898 | -2.484075 | 0.943436  |
| H    | -5.743793 | -1.924175 | -0.376921 |
| H    | -5.032254 | -0.734674 | 0.762682  |
| O    | -2.572739 | -0.450273 | -2.134358 |
| H    | -0.770517 | -1.242689 | -2.591695 |
| H    | -1.592982 | -2.058197 | -1.226723 |

|      |           |           |           |
|------|-----------|-----------|-----------|
| H    | -0.428553 | 0.775342  | -1.224783 |
| N    | 0.616557  | -0.886575 | -0.398824 |
| C    | 1.707063  | -0.246276 | -0.235414 |
| C    | 2.964019  | -1.017286 | 0.012348  |
| C    | 4.121355  | -0.386734 | 0.486677  |
| C    | 2.989398  | -2.399577 | -0.226033 |
| C    | 5.281047  | -1.125685 | 0.722463  |
| H    | 4.116189  | 0.686920  | 0.680674  |
| C    | 4.147921  | -3.133322 | 0.003224  |
| H    | 2.083462  | -2.878998 | -0.597553 |
| C    | 5.298045  | -2.497826 | 0.479852  |
| H    | 6.174553  | -0.624689 | 1.097811  |
| H    | 4.158377  | -4.206793 | -0.191978 |
| H    | 6.207210  | -3.073612 | 0.660436  |
| C    | 1.814731  | 1.250185  | -0.278179 |
| C    | 1.238858  | 2.028329  | 0.732093  |
| C    | 2.490100  | 1.875919  | -1.332646 |
| C    | 1.332368  | 3.419153  | 0.683217  |
| H    | 0.718225  | 1.540976  | 1.559136  |
| C    | 2.571244  | 3.266603  | -1.385179 |
| H    | 2.951308  | 1.268736  | -2.114823 |
| C    | 1.993656  | 4.039469  | -0.376952 |
| H    | 0.884396  | 4.019651  | 1.476393  |
| H    | 3.089785  | 3.749267  | -2.214983 |
| H    | 2.061695  | 5.127684  | -0.416254 |
| 10-5 |           |           |           |
| 0 1  |           |           |           |
| C    | 2.966556  | 3.539172  | 1.683501  |
| C    | 3.246487  | 2.189919  | 1.898074  |
| C    | 2.478114  | 1.210336  | 1.268924  |
| C    | 1.429616  | 1.567412  | 0.415774  |
| C    | 1.152296  | 2.922043  | 0.206174  |
| C    | 1.916955  | 3.902028  | 0.837811  |
| H    | 3.562854  | 4.307993  | 2.177474  |
| H    | 4.062288  | 1.897981  | 2.561340  |
| H    | 2.687000  | 0.151674  | 1.448351  |
| H    | 0.324222  | 3.198946  | -0.448240 |
| H    | 1.691729  | 4.956843  | 0.670835  |
| C    | 0.653027  | 0.480689  | -0.300867 |
| C    | 1.207611  | 0.255516  | -1.718668 |
| C    | 3.129040  | -0.993535 | -1.237177 |
| O    | 2.493815  | -1.915703 | -0.797952 |
| O    | 4.449799  | -0.930324 | -1.299413 |
| C    | 5.143668  | -2.062604 | -0.787874 |

|   |           |           |           |
|---|-----------|-----------|-----------|
| H | 6.208382  | -1.851924 | -0.921341 |
| H | 4.861940  | -2.967791 | -1.341160 |
| H | 4.914011  | -2.204204 | 0.276275  |
| O | 2.623356  | 0.128431  | -1.737926 |
| H | 0.745859  | -0.642966 | -2.154854 |
| H | 0.981454  | 1.127826  | -2.343601 |
| H | 0.780204  | -0.460091 | 0.256646  |
| N | -0.736508 | 0.855303  | -0.469362 |
| C | -1.671020 | 0.056103  | -0.135219 |
| C | -3.092118 | 0.477815  | -0.332024 |
| C | -3.377767 | 1.747020  | -0.857808 |
| C | -4.152189 | -0.375781 | -0.001625 |
| C | -4.694213 | 2.151421  | -1.047043 |
| H | -2.545049 | 2.403050  | -1.112241 |
| C | -5.473122 | 0.032014  | -0.192034 |
| H | -3.947502 | -1.366422 | 0.407084  |
| C | -5.747257 | 1.294129  | -0.713826 |
| H | -4.903936 | 3.140826  | -1.456739 |
| H | -6.290175 | -0.641951 | 0.069269  |
| H | -6.780283 | 1.612800  | -0.862162 |
| C | -1.433757 | -1.302809 | 0.460411  |
| C | -1.232131 | -2.411907 | -0.366294 |
| C | -1.397247 | -1.458903 | 1.850125  |
| C | -0.987741 | -3.666241 | 0.192967  |
| H | -1.267299 | -2.292812 | -1.451477 |
| C | -1.152065 | -2.713600 | 2.406139  |
| H | -1.557625 | -0.592601 | 2.495865  |
| C | -0.946934 | -3.818238 | 1.578577  |
| H | -0.826745 | -4.526977 | -0.457766 |
| H | -1.120662 | -2.829008 | 3.490612  |
| H | -0.755722 | -4.799527 | 2.015591  |

10-6

0 1

|   |          |           |           |
|---|----------|-----------|-----------|
| C | 5.241816 | 1.819605  | 0.714784  |
| C | 4.222354 | 2.639760  | 0.233165  |
| C | 2.975083 | 2.100762  | -0.087399 |
| C | 2.737452 | 0.733742  | 0.074949  |
| C | 3.764325 | -0.084917 | 0.561022  |
| C | 5.009812 | 0.452536  | 0.878045  |
| H | 6.214846 | 2.244219  | 0.967103  |
| H | 4.396765 | 3.709876  | 0.108096  |
| H | 2.169852 | 2.737496  | -0.454095 |
| H | 3.578549 | -1.154269 | 0.696119  |
| H | 5.799779 | -0.196331 | 1.259665  |

|      |           |           |           |
|------|-----------|-----------|-----------|
| C    | 1.408127  | 0.096741  | -0.285225 |
| C    | 1.527614  | -0.585980 | -1.651981 |
| C    | 0.262265  | -2.532969 | -1.369923 |
| O    | 1.051223  | -2.994690 | -0.587683 |
| O    | -0.834753 | -3.136174 | -1.801046 |
| C    | -1.049698 | -4.449425 | -1.296613 |
| H    | -1.068136 | -4.440219 | -0.199218 |
| H    | -0.253589 | -5.123412 | -1.639690 |
| H    | -2.016633 | -4.772876 | -1.693301 |
| O    | 0.357457  | -1.342098 | -1.955840 |
| H    | 1.610263  | 0.168467  | -2.443715 |
| H    | 2.406337  | -1.244414 | -1.664611 |
| H    | 1.210233  | -0.703048 | 0.445152  |
| N    | 0.347980  | 1.074652  | -0.370442 |
| C    | -0.810615 | 0.850923  | 0.109506  |
| C    | -1.877411 | 1.879109  | -0.100374 |
| C    | -3.033099 | 1.897290  | 0.691044  |
| C    | -1.711661 | 2.862384  | -1.086844 |
| C    | -3.999595 | 2.886698  | 0.507361  |
| H    | -3.175960 | 1.140583  | 1.464084  |
| C    | -2.680311 | 3.842776  | -1.274768 |
| H    | -0.810518 | 2.838072  | -1.700305 |
| C    | -3.826919 | 3.859236  | -0.475769 |
| H    | -4.891097 | 2.895206  | 1.136222  |
| H    | -2.544089 | 4.599300  | -2.049233 |
| H    | -4.585669 | 4.629620  | -0.622666 |
| C    | -1.192141 | -0.377019 | 0.884923  |
| C    | -2.136883 | -1.267287 | 0.362764  |
| C    | -0.611595 | -0.639520 | 2.130902  |
| C    | -2.483329 | -2.415937 | 1.074166  |
| H    | -2.593323 | -1.063388 | -0.608295 |
| C    | -0.959407 | -1.788194 | 2.839787  |
| H    | 0.119389  | 0.060559  | 2.542295  |
| C    | -1.894251 | -2.679094 | 2.311379  |
| H    | -3.219154 | -3.107727 | 0.660130  |
| H    | -0.499884 | -1.986337 | 3.809177  |
| H    | -2.166841 | -3.577552 | 2.867320  |
| 10-7 |           |           |           |
| 0 1  |           |           |           |
| C    | 4.694647  | -0.156061 | -1.012247 |
| C    | 4.274175  | 0.461425  | 0.164267  |
| C    | 3.015314  | 1.060008  | 0.234173  |
| C    | 2.160138  | 1.044485  | -0.871218 |
| C    | 2.600023  | 0.439345  | -2.054988 |



|   |           |           |           |
|---|-----------|-----------|-----------|
| C | 3.853455  | -0.162094 | -2.126565 |
| H | 5.677704  | -0.626850 | -1.064619 |
| H | 4.925629  | 0.473122  | 1.039831  |
| H | 2.701685  | 1.519268  | 1.173343  |
| H | 1.939721  | 0.430888  | -2.926021 |
| H | 4.178162  | -0.634198 | -3.055500 |
| C | 0.769225  | 1.657821  | -0.867726 |
| C | 0.489043  | 2.547147  | 0.345488  |
| C | -1.912029 | 2.652267  | 0.509045  |
| O | -2.962031 | 3.037059  | 0.079792  |
| O | -1.775715 | 1.677633  | 1.408611  |
| C | -2.982762 | 1.031656  | 1.806590  |
| H | -2.685645 | 0.225257  | 2.484869  |
| H | -3.499505 | 0.618447  | 0.930342  |
| H | -3.641345 | 1.743073  | 2.321161  |
| O | -0.756351 | 3.215537  | 0.163708  |
| H | 0.485526  | 1.973689  | 1.280501  |
| H | 1.246297  | 3.338255  | 0.410479  |
| H | 0.725999  | 2.333321  | -1.737492 |
| N | -0.360374 | 0.750758  | -1.045268 |
| C | -0.484281 | -0.381480 | -0.477210 |
| C | -1.776367 | -1.114835 | -0.677957 |
| C | -2.046060 | -2.313832 | -0.006233 |
| C | -2.758432 | -0.571157 | -1.521532 |
| C | -3.275819 | -2.954543 | -0.169097 |
| H | -1.295937 | -2.748772 | 0.655948  |
| C | -3.981845 | -1.211080 | -1.682676 |
| H | -2.542987 | 0.367214  | -2.033236 |
| C | -4.245566 | -2.405762 | -1.005104 |
| H | -3.474672 | -3.886065 | 0.362928  |
| H | -4.737797 | -0.777951 | -2.339674 |
| H | -5.207320 | -2.905660 | -1.131653 |
| C | 0.521294  | -1.029847 | 0.432687  |
| C | 1.415267  | -1.985432 | -0.062977 |
| C | 0.549063  | -0.696915 | 1.790263  |
| C | 2.357348  | -2.566430 | 0.782545  |
| H | 1.384326  | -2.256524 | -1.120467 |
| C | 1.489052  | -1.286244 | 2.636741  |
| H | -0.166778 | 0.029808  | 2.180569  |
| C | 2.399942  | -2.213710 | 2.132989  |
| H | 3.065074  | -3.295566 | 0.384459  |
| H | 1.508723  | -1.018283 | 3.694468  |
| H | 3.139586  | -2.668019 | 2.794198  |

0 1

|   |           |           |           |
|---|-----------|-----------|-----------|
| C | 1.885335  | 4.101595  | 1.846398  |
| C | 2.596687  | 3.794945  | 0.688999  |
| C | 2.270772  | 2.663119  | -0.062458 |
| C | 1.226919  | 1.823802  | 0.337016  |
| C | 0.519993  | 2.138903  | 1.505232  |
| C | 0.843481  | 3.266479  | 2.255038  |
| H | 2.141841  | 4.986489  | 2.431013  |
| H | 3.415799  | 4.438517  | 0.363900  |
| H | 2.856322  | 2.434054  | -0.953140 |
| H | -0.296756 | 1.488165  | 1.828942  |
| H | 0.280906  | 3.495645  | 3.161572  |
| C | 0.821447  | 0.569697  | -0.428369 |
| C | 1.563509  | 0.371405  | -1.748474 |
| C | 3.271574  | -1.147674 | -1.237581 |
| O | 2.499570  | -2.063694 | -1.125171 |
| O | 4.582051  | -1.223821 | -1.077872 |
| C | 5.089316  | -2.512137 | -0.746343 |
| H | 4.654379  | -2.863947 | 0.198029  |
| H | 6.171827  | -2.394414 | -0.646067 |
| H | 4.855929  | -3.231389 | -1.541881 |
| O | 2.949066  | 0.103682  | -1.550600 |
| H | 1.102533  | -0.460278 | -2.297602 |
| H | 1.513298  | 1.279290  | -2.360894 |
| H | 1.043248  | -0.299480 | 0.214741  |
| N | -0.582633 | 0.670207  | -0.780556 |
| C | -1.472890 | -0.098834 | -0.287883 |
| C | -2.896757 | 0.136963  | -0.688171 |
| C | -3.264084 | 1.372141  | -1.241177 |
| C | -3.869259 | -0.861223 | -0.544651 |
| C | -4.577129 | 1.604727  | -1.636875 |
| H | -2.497904 | 2.140130  | -1.350600 |
| C | -5.183432 | -0.629822 | -0.951444 |
| H | -3.596802 | -1.829473 | -0.121433 |
| C | -5.540993 | 0.602980  | -1.494414 |
| H | -4.854137 | 2.572752  | -2.057511 |
| H | -5.930268 | -1.417493 | -0.841522 |
| H | -6.570904 | 0.785832  | -1.805343 |
| C | -1.218095 | -1.211376 | 0.686775  |
| C | -0.385836 | -2.287396 | 0.357838  |
| C | -1.825241 | -1.172236 | 1.948525  |
| C | -0.159728 | -3.306223 | 1.283291  |
| H | 0.107744  | -2.321439 | -0.615474 |
| C | -1.590884 | -2.186872 | 2.874461  |

|      |           |           |           |
|------|-----------|-----------|-----------|
| H    | -2.486603 | -0.340394 | 2.202922  |
| C    | -0.759551 | -3.257489 | 2.541446  |
| H    | 0.493453  | -4.138829 | 1.017658  |
| H    | -2.061472 | -2.142962 | 3.857743  |
| H    | -0.580405 | -4.054404 | 3.264893  |
| 10-9 |           |           |           |
| 0 1  |           |           |           |
| C    | -3.142603 | 1.670068  | 2.228268  |
| C    | -2.796354 | 2.530469  | 1.185213  |
| C    | -1.945679 | 2.092440  | 0.172425  |
| C    | -1.430323 | 0.793686  | 0.191069  |
| C    | -1.768700 | -0.062070 | 1.244970  |
| C    | -2.624673 | 0.374929  | 2.256743  |
| H    | -3.810853 | 2.011177  | 3.020535  |
| H    | -3.191945 | 3.547134  | 1.159903  |
| H    | -1.677043 | 2.765799  | -0.645342 |
| H    | -1.363617 | -1.075105 | 1.258518  |
| H    | -2.887612 | -0.300616 | 3.072807  |
| C    | -0.581278 | 0.299906  | -0.966494 |
| C    | -1.469284 | -0.380820 | -2.015939 |
| C    | -3.471830 | -1.111350 | -1.023923 |
| O    | -4.079584 | -0.112447 | -1.299640 |
| O    | -3.932621 | -2.106301 | -0.278106 |
| C    | -5.231302 | -1.906575 | 0.266159  |
| H    | -5.234631 | -1.025778 | 0.922893  |
| H    | -5.464114 | -2.808994 | 0.838729  |
| H    | -5.968422 | -1.762181 | -0.534113 |
| O    | -2.239128 | -1.418999 | -1.421510 |
| H    | -2.135369 | 0.353231  | -2.487161 |
| H    | -0.840047 | -0.859466 | -2.776299 |
| H    | -0.125464 | 1.176578  | -1.460608 |
| N    | 0.416107  | -0.657152 | -0.523875 |
| C    | 1.606658  | -0.284812 | -0.262762 |
| C    | 2.610116  | -1.320258 | 0.134735  |
| C    | 2.296172  | -2.679622 | -0.012829 |
| C    | 3.856372  | -0.962946 | 0.664465  |
| C    | 3.210971  | -3.658219 | 0.358812  |
| H    | 1.321864  | -2.944285 | -0.424526 |
| C    | 4.771884  | -1.946731 | 1.040574  |
| H    | 4.111780  | 0.090087  | 0.792136  |
| C    | 4.453011  | -3.294292 | 0.887093  |
| H    | 2.958556  | -4.712580 | 0.235499  |
| H    | 5.737829  | -1.655504 | 1.455902  |
| H    | 5.170395  | -4.063330 | 1.178127  |

|       |           |           |           |
|-------|-----------|-----------|-----------|
| C     | 2.069106  | 1.142520  | -0.322968 |
| C     | 2.960100  | 1.557624  | -1.319268 |
| C     | 1.599007  | 2.070866  | 0.612812  |
| C     | 3.360681  | 2.891267  | -1.389810 |
| H     | 3.338549  | 0.831661  | -2.042559 |
| C     | 2.008977  | 3.402265  | 0.546002  |
| H     | 0.908960  | 1.746697  | 1.394529  |
| C     | 2.885641  | 3.814938  | -0.457275 |
| H     | 4.047738  | 3.210624  | -2.174858 |
| H     | 1.639080  | 4.119526  | 1.280363  |
| H     | 3.202273  | 4.857671  | -0.511738 |
| 10-10 |           |           |           |
| 0 1   |           |           |           |
| C     | -1.451638 | 3.725883  | -2.149006 |
| C     | -2.190045 | 3.293850  | -1.049122 |
| C     | -2.045108 | 1.991273  | -0.567356 |
| C     | -1.151444 | 1.104202  | -1.176150 |
| C     | -0.427539 | 1.540598  | -2.294047 |
| C     | -0.573262 | 2.839950  | -2.774803 |
| H     | -1.562438 | 4.745782  | -2.520487 |
| H     | -2.885999 | 3.974546  | -0.555843 |
| H     | -2.640962 | 1.674207  | 0.289047  |
| H     | 0.273218  | 0.856869  | -2.775814 |
| H     | 0.006673  | 3.162726  | -3.641218 |
| C     | -0.941782 | -0.317623 | -0.660323 |
| C     | -1.489001 | -0.558170 | 0.755561  |
| C     | -3.424685 | -1.827461 | 0.355217  |
| O     | -2.791825 | -2.808171 | 0.067943  |
| O     | -4.745171 | -1.737128 | 0.361859  |
| C     | -5.441244 | -2.920885 | -0.014476 |
| H     | -5.212936 | -3.737271 | 0.682752  |
| H     | -5.158016 | -3.224574 | -1.030475 |
| H     | -6.505567 | -2.673065 | 0.025896  |
| O     | -2.913455 | -0.655738 | 0.724779  |
| H     | -1.066111 | -1.490124 | 1.155086  |
| H     | -1.275867 | 0.267928  | 1.441888  |
| H     | -1.538982 | -0.983107 | -1.306329 |
| N     | 0.437039  | -0.750609 | -0.860258 |
| C     | 1.399979  | -0.424253 | -0.092592 |
| C     | 2.769841  | -0.929849 | -0.428841 |
| C     | 3.907653  | -0.428211 | 0.215519  |
| C     | 2.925593  | -1.905602 | -1.425165 |
| C     | 5.178137  | -0.887980 | -0.134246 |
| H     | 3.803536  | 0.333587  | 0.989551  |

|       |           |           |           |
|-------|-----------|-----------|-----------|
| C     | 4.191525  | -2.366467 | -1.768514 |
| H     | 2.032145  | -2.288654 | -1.918354 |
| C     | 5.322987  | -1.857201 | -1.124610 |
| H     | 6.057172  | -0.483902 | 0.369967  |
| H     | 4.301244  | -3.128293 | -2.542012 |
| H     | 6.316308  | -2.218047 | -1.396455 |
| C     | 1.281877  | 0.439956  | 1.130481  |
| C     | 1.064537  | 1.817160  | 1.016565  |
| C     | 1.376322  | -0.142555 | 2.400388  |
| C     | 0.906252  | 2.596027  | 2.163395  |
| H     | 1.005757  | 2.278477  | 0.029134  |
| C     | 1.209106  | 0.636292  | 3.543299  |
| H     | 1.567149  | -1.214682 | 2.489609  |
| C     | 0.967247  | 2.006445  | 3.425741  |
| H     | 0.731120  | 3.668640  | 2.067331  |
| H     | 1.269384  | 0.173224  | 4.529360  |
| H     | 0.835655  | 2.616017  | 4.321044  |
| 10-11 |           |           |           |
| 0 1   |           |           |           |
| C     | 4.714925  | -0.781419 | -1.613021 |
| C     | 4.618485  | 0.189482  | -0.619074 |
| C     | 3.398574  | 0.819334  | -0.364011 |
| C     | 2.255760  | 0.481844  | -1.096305 |
| C     | 2.366574  | -0.482935 | -2.107125 |
| C     | 3.583128  | -1.111138 | -2.361703 |
| H     | 5.667082  | -1.277617 | -1.806772 |
| H     | 5.496508  | 0.459898  | -0.030055 |
| H     | 3.354462  | 1.571414  | 0.424508  |
| H     | 1.480548  | -0.753198 | -2.684102 |
| H     | 3.648875  | -1.865583 | -3.147528 |
| C     | 0.904687  | 1.137305  | -0.840384 |
| C     | 0.860968  | 1.892945  | 0.499351  |
| C     | -1.123744 | 3.097053  | 0.173808  |
| O     | -0.653323 | 3.749840  | -0.719321 |
| O     | -2.372127 | 3.171791  | 0.607858  |
| C     | -3.201414 | 4.110366  | -0.068885 |
| H     | -3.261988 | 3.865964  | -1.137212 |
| H     | -2.803156 | 5.126760  | 0.046336  |
| H     | -4.188417 | 4.033091  | 0.395691  |
| O     | -0.475399 | 2.186327  | 0.892605  |
| H     | 1.275532  | 1.305471  | 1.325652  |
| H     | 1.426040  | 2.830681  | 0.399433  |
| H     | 0.779187  | 1.907520  | -1.617002 |
| N     | -0.204103 | 0.211482  | -1.059128 |

|   |           |           |           |
|---|-----------|-----------|-----------|
| C | -0.573135 | -0.666267 | -0.212277 |
| C | -1.761259 | -1.512566 | -0.557246 |
| C | -2.560249 | -1.164801 | -1.656979 |
| C | -2.089362 | -2.653576 | 0.186179  |
| C | -3.661075 | -1.939748 | -2.003790 |
| H | -2.294830 | -0.274580 | -2.227208 |
| C | -3.192467 | -3.433225 | -0.165912 |
| H | -1.477946 | -2.942209 | 1.042535  |
| C | -3.980826 | -3.078384 | -1.258522 |
| H | -4.277136 | -1.656007 | -2.858634 |
| H | -3.435147 | -4.321797 | 0.418807  |
| H | -4.845556 | -3.685988 | -1.530447 |
| C | 0.082801  | -0.934859 | 1.111606  |
| C | 1.332209  | -1.560829 | 1.173431  |
| C | -0.562542 | -0.558050 | 2.295924  |
| C | 1.943558  | -1.780033 | 2.408805  |
| H | 1.832347  | -1.867950 | 0.253212  |
| C | 0.055090  | -0.769593 | 3.526665  |
| H | -1.539923 | -0.074447 | 2.243544  |
| C | 1.311208  | -1.377279 | 3.584376  |
| H | 2.919752  | -2.265693 | 2.450343  |
| H | -0.445746 | -0.459351 | 4.445023  |
| H | 1.793667  | -1.542186 | 4.549160  |

10-12

0 1

|   |           |           |           |
|---|-----------|-----------|-----------|
| C | -1.197023 | 4.385674  | 0.498498  |
| C | -0.108385 | 4.135345  | -0.338331 |
| C | 0.070809  | 2.870986  | -0.895445 |
| C | -0.831187 | 1.833963  | -0.622967 |
| C | -1.930488 | 2.098579  | 0.199443  |
| C | -2.108570 | 3.364646  | 0.760020  |
| H | -1.334839 | 5.373213  | 0.941753  |
| H | 0.609474  | 4.928460  | -0.554446 |
| H | 0.932151  | 2.673656  | -1.535750 |
| H | -2.660835 | 1.317228  | 0.411668  |
| H | -2.966878 | 3.550557  | 1.407882  |
| C | -0.587719 | 0.455067  | -1.230091 |
| C | -1.410908 | -0.666458 | -0.592805 |
| C | -3.576048 | -1.521686 | -0.768244 |
| O | -3.318511 | -2.432899 | -0.028665 |
| O | -4.749491 | -1.297708 | -1.339884 |
| C | -5.771711 | -2.237883 | -1.028464 |
| H | -6.660446 | -1.912953 | -1.576695 |
| H | -5.970203 | -2.244471 | 0.050995  |

|   |           |           |           |
|---|-----------|-----------|-----------|
| H | -5.475643 | -3.245879 | -1.346461 |
| O | -2.725131 | -0.572566 | -1.145778 |
| H | -0.977927 | -1.644814 | -0.848759 |
| H | -1.477427 | -0.596036 | 0.501280  |
| H | -0.952303 | 0.501014  | -2.270108 |
| N | 0.840669  | 0.171402  | -1.337613 |
| C | 1.551729  | -0.243350 | -0.365117 |
| C | 3.005338  | -0.505526 | -0.616418 |
| C | 3.897479  | -0.721435 | 0.441432  |
| C | 3.491768  | -0.523838 | -1.932316 |
| C | 5.251650  | -0.945564 | 0.188818  |
| H | 3.535699  | -0.708174 | 1.470696  |
| C | 4.840000  | -0.753615 | -2.182576 |
| H | 2.786899  | -0.355783 | -2.746694 |
| C | 5.725191  | -0.964356 | -1.121423 |
| H | 5.938055  | -1.107050 | 1.021267  |
| H | 5.206211  | -0.770814 | -3.210375 |
| H | 6.783253  | -1.144600 | -1.318579 |
| C | 1.050654  | -0.501897 | 1.026807  |
| C | 0.718473  | 0.556213  | 1.879314  |
| C | 0.894942  | -1.821698 | 1.467729  |
| C | 0.200875  | 0.292848  | 3.148082  |
| H | 0.854399  | 1.586400  | 1.544776  |
| C | 0.367394  | -2.081304 | 2.730452  |
| H | 1.173053  | -2.647811 | 0.808942  |
| C | 0.013961  | -1.023252 | 3.570341  |
| H | -0.061517 | 1.122319  | 3.806592  |
| H | 0.230765  | -3.112084 | 3.060447  |
| H | -0.400904 | -1.225569 | 4.559029  |

**11ts**

0 2

|   |           |           |           |
|---|-----------|-----------|-----------|
| C | 2.947102  | -0.530826 | 0.401617  |
| C | 2.329373  | -1.054858 | -0.732264 |
| C | 1.198087  | -0.434368 | -1.254668 |
| C | 0.665989  | 0.712114  | -0.635799 |
| C | 1.307555  | 1.237347  | 0.504200  |
| C | 2.438797  | 0.620290  | 1.015303  |
| H | 3.834024  | -1.016457 | 0.811499  |
| H | 2.728748  | -1.949413 | -1.210834 |
| H | 0.700916  | -0.845506 | -2.134243 |
| H | 0.928018  | 2.138705  | 0.987461  |
| H | 2.932731  | 1.033221  | 1.895354  |
| C | -0.556813 | 1.282765  | -1.175341 |
| H | -0.877774 | 0.910487  | -2.149128 |

|   |           |           |           |
|---|-----------|-----------|-----------|
| C | -1.256173 | 2.340143  | -0.626078 |
| H | -0.966968 | 2.803504  | 0.317433  |
| H | -2.149255 | 2.716370  | -1.122740 |
| O | -2.264484 | 0.020721  | -0.439372 |
| C | -1.606345 | -1.038590 | -0.114866 |
| O | -1.116815 | -1.094623 | 1.149393  |
| O | -1.376800 | -1.983439 | -0.847474 |
| C | -1.510101 | -0.099801 | 2.072117  |
| H | -1.117435 | -0.409298 | 3.047430  |
| H | -1.089223 | 0.881854  | 1.810632  |
| H | -2.603820 | -0.010036 | 2.121434  |

**12**

0 2

|   |           |           |           |
|---|-----------|-----------|-----------|
| C | -3.245509 | -1.317144 | -0.195214 |
| C | -3.156553 | -0.501169 | 0.933801  |
| C | -2.074245 | 0.363372  | 1.087045  |
| C | -1.073011 | 0.420762  | 0.113399  |
| C | -1.166431 | -0.394402 | -1.017835 |
| C | -2.248263 | -1.262480 | -1.168660 |
| H | -4.090180 | -1.997386 | -0.313730 |
| H | -3.930503 | -0.542925 | 1.701748  |
| H | -2.001983 | 0.998052  | 1.973538  |
| H | -0.384701 | -0.352621 | -1.778660 |
| H | -2.311628 | -1.899532 | -2.052299 |
| C | 0.061333  | 1.415611  | 0.267539  |
| H | 0.316848  | 1.504390  | 1.332739  |
| C | -0.298689 | 2.746041  | -0.296488 |
| C | 1.922123  | -0.023307 | 0.169214  |
| O | 1.690586  | -0.479538 | 1.256125  |
| O | 2.908237  | -0.402691 | -0.631084 |
| C | 3.746926  | -1.434789 | -0.123848 |
| H | 4.496500  | -1.624304 | -0.897150 |
| H | 3.161746  | -2.342589 | 0.071163  |
| H | 4.231912  | -1.112503 | 0.806516  |
| O | 1.236227  | 0.947099  | -0.430606 |
| H | -0.787852 | 2.795189  | -1.269832 |
| H | 0.060046  | 3.662710  | 0.170454  |

**13ts**

0 2

|   |           |           |           |
|---|-----------|-----------|-----------|
| C | -4.249051 | 0.443901  | -1.211157 |
| C | -3.664662 | -0.537747 | -2.013207 |
| C | -2.777468 | -1.455491 | -1.458044 |
| C | -2.438705 | -1.403548 | -0.092309 |
| C | -3.042915 | -0.412267 | 0.703341  |



|   |           |           |           |
|---|-----------|-----------|-----------|
| C | -3.937033 | 0.496398  | 0.149481  |
| H | -4.951570 | 1.159673  | -1.641251 |
| H | -3.906209 | -0.591568 | -3.076187 |
| H | -2.325675 | -2.226233 | -2.086776 |
| H | -2.820799 | -0.365174 | 1.770858  |
| H | -4.394251 | 1.257097  | 0.784965  |
| C | -1.510043 | -2.384807 | 0.455654  |
| C | -0.807425 | -2.274078 | 1.630527  |
| H | -1.006445 | -1.452042 | 2.321736  |
| H | -0.349272 | -3.161257 | 2.061310  |
| H | -1.323236 | -3.264095 | -0.168596 |
| N | 1.142707  | -1.718318 | 1.106052  |
| C | 1.317937  | -0.576445 | 0.595182  |
| C | 0.297011  | 0.521295  | 0.519582  |
| C | -0.162561 | 0.974357  | -0.722471 |
| C | -0.131487 | 1.152850  | 1.689698  |
| C | -1.047036 | 2.047583  | -0.789219 |
| H | 0.180102  | 0.485056  | -1.636938 |
| C | -1.004004 | 2.240365  | 1.618195  |
| H | 0.240053  | 0.805029  | 2.656268  |
| C | -1.459183 | 2.689402  | 0.380268  |
| H | -1.414393 | 2.388213  | -1.758703 |
| H | -1.323767 | 2.739761  | 2.534319  |
| H | -2.143557 | 3.537627  | 0.324780  |
| C | 2.688052  | -0.255998 | 0.051911  |
| C | 3.559496  | -1.297594 | -0.296906 |
| C | 3.114791  | 1.070029  | -0.089017 |
| C | 4.834586  | -1.016166 | -0.777257 |
| H | 3.217028  | -2.327432 | -0.188997 |
| C | 4.395801  | 1.348593  | -0.566193 |
| H | 2.445463  | 1.888954  | 0.179553  |
| C | 5.256926  | 0.308575  | -0.912510 |
| H | 5.502533  | -1.833932 | -1.052368 |
| H | 4.720432  | 2.385195  | -0.668402 |
| H | 6.256461  | 0.528104  | -1.291221 |

**14**

0 2

|   |           |           |           |
|---|-----------|-----------|-----------|
| C | -4.406381 | -0.610835 | -1.793402 |
| C | -4.943236 | -1.115357 | -0.602718 |
| C | -4.262104 | -0.957055 | 0.594638  |
| C | -3.011984 | -0.285577 | 0.646689  |
| C | -2.486444 | 0.219004  | -0.572904 |
| C | -3.176915 | 0.055831  | -1.766437 |
| H | -4.942045 | -0.736605 | -2.735253 |

|   |           |           |           |
|---|-----------|-----------|-----------|
| H | -5.901397 | -1.637679 | -0.615602 |
| H | -4.683634 | -1.353886 | 1.520933  |
| H | -1.528903 | 0.743468  | -0.574752 |
| H | -2.753356 | 0.452463  | -2.691044 |
| C | -2.333153 | -0.135649 | 1.886850  |
| C | -0.975685 | 0.489683  | 2.005594  |
| H | -0.953614 | 1.457068  | 1.472463  |
| H | -0.768840 | 0.699257  | 3.066467  |
| H | -2.794384 | -0.565567 | 2.778023  |
| N | 0.036003  | -0.445145 | 1.532799  |
| C | 0.956950  | -0.097943 | 0.723422  |
| C | 1.180662  | 1.302013  | 0.229766  |
| C | 1.087963  | 1.593427  | -1.137149 |
| C | 1.483565  | 2.329502  | 1.130129  |
| C | 1.275889  | 2.897678  | -1.592270 |
| H | 0.867136  | 0.790999  | -1.845433 |
| C | 1.685596  | 3.630928  | 0.672520  |
| H | 1.564467  | 2.104196  | 2.195769  |
| C | 1.577036  | 3.917437  | -0.688444 |
| H | 1.192344  | 3.117405  | -2.657639 |
| H | 1.925746  | 4.424400  | 1.381711  |
| H | 1.729549  | 4.936688  | -1.046546 |
| C | 1.893144  | -1.155965 | 0.225836  |
| C | 1.536399  | -2.506204 | 0.354377  |
| C | 3.130172  | -0.831073 | -0.344878 |
| C | 2.397539  | -3.508199 | -0.079629 |
| H | 0.571222  | -2.744194 | 0.802397  |
| C | 3.996207  | -1.837763 | -0.773942 |
| H | 3.425840  | 0.214469  | -0.445782 |
| C | 3.632018  | -3.176591 | -0.644704 |
| H | 2.106423  | -4.555135 | 0.019847  |
| H | 4.960255  | -1.572060 | -1.210388 |
| H | 4.307743  | -3.963035 | -0.984839 |

**15ts**

0 2

|   |          |           |           |
|---|----------|-----------|-----------|
| C | 5.334667 | -1.140831 | -0.136347 |
| C | 5.095870 | -0.242557 | 0.902216  |
| C | 3.916882 | 0.503459  | 0.930387  |
| C | 2.953284 | 0.355991  | -0.073881 |
| C | 3.207925 | -0.546423 | -1.115930 |
| C | 4.385862 | -1.287047 | -1.150629 |
| H | 6.257957 | -1.721961 | -0.159292 |
| H | 5.835720 | -0.112573 | 1.693851  |
| H | 3.760482 | 1.221255  | 1.736613  |

|   |           |           |           |
|---|-----------|-----------|-----------|
| H | 2.456294  | -0.675235 | -1.897315 |
| H | 4.564105  | -1.986144 | -1.969444 |
| C | 1.686649  | 1.143704  | -0.086085 |
| C | 1.309425  | 1.963590  | 0.958859  |
| H | 0.518073  | 2.702184  | 0.831901  |
| H | 1.724655  | 1.836668  | 1.959850  |
| H | 1.350128  | 1.431404  | -1.086197 |
| N | 0.417932  | -0.428752 | -0.100442 |
| C | -0.827356 | -0.207666 | -0.067669 |
| C | -1.751595 | -1.393949 | 0.011833  |
| C | -3.084723 | -1.293320 | -0.403156 |
| C | -1.269868 | -2.622954 | 0.484358  |
| C | -3.922557 | -2.407701 | -0.351600 |
| H | -3.468248 | -0.341075 | -0.773772 |
| C | -2.109931 | -3.730702 | 0.540530  |
| H | -0.230879 | -2.690374 | 0.809190  |
| C | -3.438417 | -3.626486 | 0.121091  |
| H | -4.958645 | -2.320786 | -0.682181 |
| H | -1.728800 | -4.681338 | 0.917144  |
| H | -4.096260 | -4.495865 | 0.165757  |
| C | -1.464114 | 1.150947  | -0.102695 |
| C | -2.188713 | 1.602401  | 1.005329  |
| C | -1.319449 | 1.976640  | -1.220574 |
| C | -2.723811 | 2.888794  | 1.012412  |
| H | -2.316272 | 0.946440  | 1.869271  |
| C | -1.866611 | 3.259848  | -1.215892 |
| H | -0.776201 | 1.613036  | -2.095292 |
| C | -2.559172 | 3.721308  | -0.096269 |
| H | -3.272938 | 3.242880  | 1.886252  |
| H | -1.751056 | 3.902261  | -2.090165 |
| H | -2.979123 | 4.728198  | -0.090817 |

**16**

0 2

|   |          |           |           |
|---|----------|-----------|-----------|
| C | 4.368634 | -1.227007 | -1.478024 |
| C | 3.320888 | -2.139626 | -1.344066 |
| C | 2.310771 | -1.918411 | -0.408447 |
| C | 2.336110 | -0.776369 | 0.399816  |
| C | 3.387834 | 0.134388  | 0.261681  |
| C | 4.400173 | -0.089229 | -0.671308 |
| H | 5.156453 | -1.400193 | -2.212808 |
| H | 3.289849 | -3.030227 | -1.974333 |
| H | 1.486122 | -2.626054 | -0.306222 |
| H | 3.405174 | 1.034242  | 0.881960  |
| H | 5.212100 | 0.632707  | -0.774251 |

|   |           |           |           |
|---|-----------|-----------|-----------|
| C | 1.252186  | -0.533712 | 1.451130  |
| C | 1.588306  | -1.283908 | 2.701423  |
| H | 2.391680  | -0.921645 | 3.343443  |
| H | 1.247277  | -2.315381 | 2.801023  |
| H | 1.259553  | 0.550209  | 1.668065  |
| N | -0.044630 | -0.982269 | 0.964709  |
| C | -0.862004 | -0.162686 | 0.433141  |
| C | -2.206260 | -0.661945 | 0.005149  |
| C | -3.026752 | 0.096451  | -0.839691 |
| C | -2.657029 | -1.914999 | 0.446791  |
| C | -4.272041 | -0.389770 | -1.238928 |
| H | -2.688475 | 1.070732  | -1.195780 |
| C | -3.901251 | -2.395435 | 0.053093  |
| H | -2.011842 | -2.496870 | 1.105517  |
| C | -4.712941 | -1.634118 | -0.792778 |
| H | -4.899074 | 0.208821  | -1.901393 |
| H | -4.244840 | -3.368237 | 0.408735  |
| H | -5.689124 | -2.011714 | -1.101457 |
| C | -0.567786 | 1.291118  | 0.196628  |
| C | -1.232261 | 2.274438  | 0.938640  |
| C | 0.366784  | 1.671863  | -0.772370 |
| C | -0.950821 | 3.623168  | 0.726126  |
| H | -1.972310 | 1.978250  | 1.685512  |
| C | 0.638825  | 3.022596  | -0.990755 |
| H | 0.879388  | 0.906192  | -1.358647 |
| C | -0.015851 | 3.998735  | -0.239545 |
| H | -1.466561 | 4.384524  | 1.313276  |
| H | 1.364984  | 3.312434  | -1.751857 |
| H | 0.198983  | 5.054840  | -0.409969 |

**17ts**

0 1

|   |           |           |           |
|---|-----------|-----------|-----------|
| C | 1.591817  | 0.231707  | 0.148453  |
| O | 1.133136  | -0.469543 | 0.999506  |
| O | 2.770859  | 0.140708  | -0.430323 |
| C | 3.610098  | -0.922604 | 0.034342  |
| H | 4.542473  | -0.833402 | -0.528604 |
| H | 3.795709  | -0.812005 | 1.109669  |
| H | 3.131546  | -1.890009 | -0.160706 |
| O | 0.960544  | 1.288937  | -0.389231 |
| C | -1.591817 | 0.231706  | -0.148453 |
| O | -1.133134 | -0.469547 | -0.999502 |
| O | -2.770860 | 0.140709  | 0.430320  |
| C | -3.610098 | -0.922604 | -0.034342 |
| H | -4.542475 | -0.833399 | 0.528601  |

|             |           |           |           |
|-------------|-----------|-----------|-----------|
| H           | -3.795705 | -0.812010 | -1.109670 |
| H           | -3.131547 | -1.890009 | 0.160713  |
| O           | -0.960545 | 1.288937  | 0.389229  |
| <b>18</b>   |           |           |           |
| 0 1         |           |           |           |
| C           | -1.427866 | -0.129697 | -0.371772 |
| O           | -1.145998 | -0.984878 | 0.405820  |
| O           | -2.546300 | 0.543808  | -0.483540 |
| C           | -3.559491 | 0.218410  | 0.472028  |
| H           | -4.409581 | 0.863504  | 0.237572  |
| H           | -3.838940 | -0.837938 | 0.377636  |
| H           | -3.193936 | 0.415036  | 1.487246  |
| O           | -0.599209 | 0.349065  | -1.355011 |
| C           | 1.427884  | 0.130175  | -0.371583 |
| O           | 1.145963  | 0.984521  | 0.406907  |
| O           | 2.546341  | -0.543177 | -0.484030 |
| C           | 3.559478  | -0.218790 | 0.471935  |
| H           | 4.409626  | -0.863544 | 0.236759  |
| H           | 3.838840  | 0.837689  | 0.378763  |
| H           | 3.193913  | -0.416615 | 1.486918  |
| O           | 0.599275  | -0.347570 | -1.355352 |
| <b>19ts</b> |           |           |           |
| 0 1         |           |           |           |
| N           | -1.149044 | -0.082230 | -1.923503 |
| C           | -1.738580 | 0.426295  | -0.928902 |
| C           | -1.074109 | 1.208504  | 0.159398  |
| C           | -0.094882 | 2.161967  | -0.140557 |
| C           | -1.410496 | 0.953381  | 1.493797  |
| C           | 0.558292  | 2.836569  | 0.888468  |
| H           | 0.154897  | 2.358574  | -1.183722 |
| C           | -0.750543 | 1.625624  | 2.520887  |
| H           | -2.176669 | 0.210339  | 1.725847  |
| C           | 0.236152  | 2.564093  | 2.219950  |
| H           | 1.320647  | 3.580635  | 0.652013  |
| H           | -1.003262 | 1.409824  | 3.560255  |
| H           | 0.751761  | 3.091419  | 3.024384  |
| C           | -3.220748 | 0.186817  | -0.830828 |
| C           | -3.760425 | -1.024348 | -1.281164 |
| C           | -4.070190 | 1.175596  | -0.319663 |
| C           | -5.134842 | -1.243260 | -1.220355 |
| H           | -3.090323 | -1.792022 | -1.671048 |
| C           | -5.445374 | 0.955218  | -0.267071 |
| H           | -3.652265 | 2.119877  | 0.034589  |
| C           | -5.979396 | -0.253638 | -0.715179 |

|   |           |           |           |
|---|-----------|-----------|-----------|
| H | -5.548210 | -2.191632 | -1.567001 |
| H | -6.103497 | 1.731303  | 0.126324  |
| H | -7.055727 | -0.425776 | -0.667743 |
| N | 1.148894  | 0.082759  | -1.923858 |
| C | 1.738572  | -0.426009 | -0.929466 |
| C | 1.074291  | -1.209254 | 0.158175  |
| C | 0.095325  | -2.162717 | -0.142611 |
| C | 1.410513  | -0.955131 | 1.492816  |
| C | -0.557732 | -2.838327 | 0.885828  |
| H | -0.154331 | -2.358632 | -1.185930 |
| C | 0.750640  | -1.628355 | 2.519314  |
| H | 2.176546  | -0.212170 | 1.725579  |
| C | -0.235776 | -2.566844 | 2.217555  |
| H | -1.319905 | -3.582355 | 0.648686  |
| H | 1.003229  | -1.413314 | 3.558866  |
| H | -0.751370 | -3.094867 | 3.021543  |
| C | 3.220602  | -0.185809 | -0.831047 |
| C | 3.759692  | 1.025876  | -1.280647 |
| C | 4.070522  | -1.174471 | -0.320449 |
| C | 5.134007  | 1.245400  | -1.219730 |
| H | 3.089274  | 1.793444  | -1.670201 |
| C | 5.445597  | -0.953459 | -0.267693 |
| H | 3.653038  | -2.119177 | 0.033153  |
| C | 5.979042  | 0.255885  | -0.715154 |
| H | 5.546947  | 2.194178  | -1.565752 |
| H | 6.104061  | -1.729455 | 0.125316  |
| H | 7.055294  | 0.428499  | -0.667658 |

**20**

0 1

|   |           |           |           |
|---|-----------|-----------|-----------|
| N | -1.354878 | -1.923649 | -1.016127 |
| C | -2.135937 | -1.113164 | -1.632020 |
| C | -1.686418 | -0.232957 | -2.753912 |
| C | -0.992590 | -0.757778 | -3.850291 |
| C | -1.909964 | 1.147382  | -2.680044 |
| C | -0.529520 | 0.085767  | -4.858175 |
| H | -0.810803 | -1.832634 | -3.906224 |
| C | -1.439267 | 1.991018  | -3.684599 |
| H | -2.440733 | 1.561302  | -1.819335 |
| C | -0.748356 | 1.461927  | -4.774982 |
| H | 0.006465  | -0.333382 | -5.711044 |
| H | -1.609077 | 3.066401  | -3.612672 |
| H | -0.380234 | 2.122574  | -5.561466 |
| C | -3.544218 | -1.021989 | -1.153519 |
| C | -3.877678 | -1.466179 | 0.134665  |

|   |           |           |           |
|---|-----------|-----------|-----------|
| C | -4.556293 | -0.518405 | -1.980794 |
| C | -5.192585 | -1.403149 | 0.584160  |
| H | -3.088612 | -1.862310 | 0.774876  |
| C | -5.875187 | -0.461074 | -1.530216 |
| H | -4.312788 | -0.178313 | -2.988559 |
| C | -6.196617 | -0.900312 | -0.247221 |
| H | -5.438164 | -1.745712 | 1.590611  |
| H | -6.653939 | -0.073045 | -2.188435 |
| H | -7.227515 | -0.851119 | 0.106958  |
| N | -0.075978 | -2.093499 | -1.387932 |
| C | 0.839541  | -1.250805 | -1.075677 |
| C | 0.570338  | 0.020775  | -0.337137 |
| C | -0.153847 | 0.021868  | 0.860740  |
| C | 1.001251  | 1.237186  | -0.880449 |
| C | -0.439503 | 1.222913  | 1.507058  |
| H | -0.499396 | -0.924809 | 1.280606  |
| C | 0.706655  | 2.438326  | -0.238193 |
| H | 1.557941  | 1.238857  | -1.820563 |
| C | -0.013225 | 2.432941  | 0.956980  |
| H | -1.001458 | 1.214609  | 2.442167  |
| H | 1.038725  | 3.381823  | -0.674269 |
| H | -0.242349 | 3.372705  | 1.461881  |
| C | 2.226205  | -1.546964 | -1.533797 |
| C | 2.435889  | -2.441371 | -2.593999 |
| C | 3.335436  | -0.959568 | -0.911613 |
| C | 3.725557  | -2.739237 | -3.021724 |
| H | 1.570053  | -2.898592 | -3.074263 |
| C | 4.628130  | -1.263517 | -1.338547 |
| H | 3.187822  | -0.265324 | -0.082838 |
| C | 4.826885  | -2.151071 | -2.394756 |
| H | 3.874836  | -3.433805 | -3.849839 |
| H | 5.483158  | -0.803390 | -0.840987 |
| H | 5.838281  | -2.384789 | -2.731037 |

**21ts**

0 1

|   |           |           |           |
|---|-----------|-----------|-----------|
| C | 2.559318  | -1.192234 | 0.771791  |
| O | 3.236077  | -0.448353 | 1.441510  |
| O | 2.817173  | -1.640876 | -0.432812 |
| C | 4.032860  | -1.172409 | -1.022941 |
| H | 4.070019  | -1.614795 | -2.021843 |
| H | 4.021949  | -0.076832 | -1.085495 |
| H | 4.892977  | -1.499231 | -0.425473 |
| O | 1.450910  | -1.644655 | 1.293620  |
| N | -0.344382 | -1.647567 | -0.792824 |

|   |           |           |           |
|---|-----------|-----------|-----------|
| C | -0.796792 | -0.523882 | -0.447251 |
| C | 0.158268  | 0.617976  | -0.268973 |
| C | 1.137590  | 0.851912  | -1.240358 |
| C | 0.117529  | 1.409481  | 0.885171  |
| C | 2.064587  | 1.878507  | -1.061971 |
| H | 1.161210  | 0.227387  | -2.135171 |
| C | 1.056355  | 2.423070  | 1.065377  |
| H | -0.642922 | 1.221027  | 1.645740  |
| C | 2.028618  | 2.660320  | 0.092381  |
| H | 2.816631  | 2.069453  | -1.829615 |
| H | 1.030807  | 3.029685  | 1.971657  |
| H | 2.759600  | 3.457490  | 0.234668  |
| C | -2.264455 | -0.332415 | -0.223398 |
| C | -3.061465 | -1.439431 | 0.099614  |
| C | -2.855920 | 0.927295  | -0.374108 |
| C | -4.433715 | -1.286046 | 0.268970  |
| H | -2.592356 | -2.416751 | 0.223136  |
| C | -4.232073 | 1.075473  | -0.204829 |
| H | -2.240033 | 1.790404  | -0.632852 |
| C | -5.021667 | -0.028233 | 0.116584  |
| H | -5.048147 | -2.150157 | 0.525684  |
| H | -4.688867 | 2.058609  | -0.327047 |
| H | -6.097706 | 0.091438  | 0.251497  |

**22ts**

0 2

|   |           |           |           |
|---|-----------|-----------|-----------|
| C | -0.791631 | 0.029194  | -0.014979 |
| O | -1.388305 | -0.975872 | 0.130738  |
| O | 0.694662  | -0.115948 | -0.630200 |
| C | 1.737888  | -0.140339 | 0.302063  |
| H | 2.462463  | -0.872133 | -0.095383 |
| H | 2.243218  | 0.837183  | 0.324093  |
| H | 1.399022  | -0.445427 | 1.301183  |
| O | -0.779138 | 1.235227  | 0.092913  |

**23**

0 2

|   |           |           |           |
|---|-----------|-----------|-----------|
| O | -0.790164 | 0.005095  | 0.000059  |
| C | 0.570708  | 0.012489  | 0.000109  |
| H | 1.029611  | 1.016549  | 0.001959  |
| H | 0.934217  | -0.568266 | 0.872705  |
| H | 0.933235  | -0.563980 | -0.875789 |

**24**

0 1

|   |          |          |           |
|---|----------|----------|-----------|
| C | 3.323092 | 2.688857 | -0.606266 |
| C | 2.538620 | 1.958544 | -1.500636 |



|   |           |           |           |
|---|-----------|-----------|-----------|
| C | 1.352907  | 1.365392  | -1.071737 |
| C | 0.939556  | 1.507891  | 0.256199  |
| C | 1.725259  | 2.241407  | 1.148352  |
| C | 2.916150  | 2.828028  | 0.720041  |
| H | 4.251352  | 3.151737  | -0.945131 |
| H | 2.854128  | 1.848611  | -2.539318 |
| H | 0.736829  | 0.789055  | -1.762536 |
| H | 1.400450  | 2.360528  | 2.184911  |
| H | 3.521944  | 3.402495  | 1.422381  |
| C | -0.320839 | 0.839759  | 0.750102  |
| C | -0.098821 | -0.600489 | 1.181156  |
| C | 0.670414  | -2.604749 | 0.281427  |
| O | 0.539999  | -3.171741 | 1.332624  |
| O | 1.106869  | -3.148054 | -0.843487 |
| C | 1.450389  | -4.527165 | -0.764180 |
| H | 1.804273  | -4.809411 | -1.759619 |
| H | 0.572160  | -5.125030 | -0.488106 |
| H | 2.240908  | -4.682750 | -0.018882 |
| O | 0.396735  | -1.322547 | 0.062365  |
| H | 0.626019  | -0.635042 | 2.007666  |
| H | -1.042888 | -1.045442 | 1.527557  |
| H | -0.716039 | 1.378325  | 1.623398  |
| O | -1.289304 | 0.884883  | -0.301559 |
| C | -2.566830 | 0.782223  | 0.056526  |
| O | -2.969407 | 0.658560  | 1.182832  |
| O | -3.318615 | 0.840930  | -1.029294 |
| C | -4.722438 | 0.736417  | -0.812659 |
| H | -5.187036 | 0.808842  | -1.799871 |
| H | -4.965896 | -0.226149 | -0.344749 |
| H | -5.071186 | 1.551298  | -0.165496 |

**25ts**

0 1

|   |           |          |           |
|---|-----------|----------|-----------|
| C | 2.488904  | 3.096027 | 0.964894  |
| C | 3.047964  | 2.403381 | -0.117638 |
| C | 2.243299  | 1.645306 | -0.951400 |
| C | 0.838555  | 1.529094 | -0.737180 |
| C | 0.293294  | 2.249524 | 0.363416  |
| C | 1.111298  | 3.014004 | 1.187352  |
| H | 3.120539  | 3.694979 | 1.622167  |
| H | 4.122408  | 2.453730 | -0.302627 |
| H | 2.688460  | 1.100602 | -1.787242 |
| H | -0.772850 | 2.192024 | 0.566286  |
| H | 0.664578  | 3.552665 | 2.025377  |
| C | 0.111111  | 0.678216 | -1.609347 |

|   |           |           |           |
|---|-----------|-----------|-----------|
| H | 0.697424  | 0.153527  | -2.367952 |
| C | -1.333639 | 0.332117  | -1.673451 |
| C | -3.421241 | 0.851326  | -0.785697 |
| O | -3.992206 | 0.158884  | -1.583748 |
| O | -3.992025 | 1.508184  | 0.215985  |
| C | -5.408563 | 1.396875  | 0.293390  |
| H | -5.714115 | 1.997238  | 1.154865  |
| H | -5.705786 | 0.349386  | 0.434247  |
| H | -5.873769 | 1.781092  | -0.623590 |
| O | -2.116339 | 1.090557  | -0.760095 |
| H | -1.716567 | 0.493544  | -2.696017 |
| H | -1.482485 | -0.743012 | -1.455662 |
| C | -2.737345 | -2.984747 | 0.003191  |
| C | -3.072102 | -1.884109 | 0.802321  |
| C | -2.079089 | -1.115902 | 1.388977  |
| C | -0.701627 | -1.416024 | 1.197850  |
| C | -0.384691 | -2.544620 | 0.393294  |
| C | -1.390412 | -3.308450 | -0.186103 |
| H | -3.519988 | -3.583904 | -0.463523 |
| H | -4.121127 | -1.626793 | 0.960359  |
| H | -2.349779 | -0.249023 | 1.996319  |
| H | 0.657587  | -2.808532 | 0.226178  |
| H | -1.120699 | -4.170386 | -0.799087 |
| C | 0.267730  | -0.573830 | 1.807983  |
| H | -0.100429 | 0.202477  | 2.480556  |
| C | 1.750066  | -0.656836 | 1.700431  |
| C | 3.440388  | -0.990603 | 0.127771  |
| O | 4.291162  | -0.613642 | 0.888425  |
| O | 3.642085  | -1.361225 | -1.130965 |
| C | 4.989784  | -1.283040 | -1.580600 |
| H | 4.988246  | -1.644800 | -2.612669 |
| H | 5.640330  | -1.909345 | -0.956815 |
| H | 5.345929  | -0.244638 | -1.541825 |
| O | 2.149412  | -1.108884 | 0.404303  |
| H | 2.194224  | 0.335562  | 1.878279  |
| H | 2.179043  | -1.343635 | 2.454422  |

**26**

0 1

|   |          |          |           |
|---|----------|----------|-----------|
| C | 3.067758 | 3.493396 | 0.153232  |
| C | 3.410735 | 2.380719 | -0.613604 |
| C | 2.457657 | 1.398373 | -0.882626 |
| C | 1.152674 | 1.507975 | -0.388485 |
| C | 0.818009 | 2.629991 | 0.382599  |
| C | 1.768091 | 3.615587 | 0.647407  |

|   |           |           |           |
|---|-----------|-----------|-----------|
| H | 3.810606  | 4.264043  | 0.364698  |
| H | 4.424010  | 2.275611  | -1.005367 |
| H | 2.730343  | 0.525026  | -1.482081 |
| H | -0.196509 | 2.731136  | 0.773183  |
| H | 1.491997  | 4.484913  | 1.246819  |
| C | 0.151788  | 0.400374  | -0.647037 |
| H | 0.611591  | -0.297405 | -1.364441 |
| C | -1.138958 | 0.868104  | -1.312526 |
| C | -3.285225 | 1.356667  | -0.474467 |
| O | -3.846999 | 0.825193  | -1.392891 |
| O | -3.878593 | 1.887909  | 0.586725  |
| C | -5.298586 | 1.789615  | 0.606054  |
| H | -5.625825 | 2.299413  | 1.516530  |
| H | -5.607158 | 0.735833  | 0.626129  |
| H | -5.729893 | 2.273735  | -0.279450 |
| O | -1.971035 | 1.505216  | -0.339705 |
| H | -0.927369 | 1.582423  | -2.121594 |
| H | -1.685603 | 0.013185  | -1.730968 |
| C | -3.069158 | -3.488498 | -0.153066 |
| C | -3.410372 | -2.376899 | 0.616062  |
| C | -2.456342 | -1.395505 | 0.885202  |
| C | -1.152225 | -1.504876 | 0.388836  |
| C | -0.819220 | -2.625994 | -0.384325 |
| C | -1.770209 | -3.610653 | -0.649253 |
| H | -3.812741 | -4.258377 | -0.364754 |
| H | -4.423003 | -2.271778 | 1.009512  |
| H | -2.727740 | -0.522910 | 1.486334  |
| H | 0.194668  | -2.727151 | -0.776577 |
| H | -1.495433 | -4.479210 | -1.250380 |
| C | -0.150637 | -0.397900 | 0.647074  |
| H | -0.609721 | 0.300046  | 1.364808  |
| C | 1.140337  | -0.866187 | 1.311590  |
| C | 3.285364  | -1.360620 | 0.474055  |
| O | 3.848164  | -0.831780 | 1.393367  |
| O | 3.877835  | -1.892973 | -0.587067 |
| C | 5.298131  | -1.798756 | -0.605224 |
| H | 5.624255  | -2.303771 | -1.518763 |
| H | 5.727540  | -2.289901 | 0.277336  |
| H | 5.609923  | -0.745828 | -0.618482 |
| O | 1.970780  | -1.504507 | 0.338129  |
| H | 1.688027  | -0.011228 | 1.728637  |
| H | 0.929149  | -1.579760 | 2.121411  |

**CO<sub>2</sub>**

0 1

|   |           |           |           |
|---|-----------|-----------|-----------|
| C | 0.000000  | 0.000060  | 0.000007  |
| O | 0.004970  | -0.002450 | -1.156134 |
| O | -0.004970 | 0.002406  | 1.156129  |
